# Supplementary material for: The structural classification of the highly disordered crystal phases of [Nn][BF4], [Nn][PF6], [Pn][BF4], and [Pn][PF6] salts (Nn+= tetraalkylammonium and Pn+= tetraalkylphosphonium)
Source: Royal Society of Chemistry journal article supplement (doi:10.1039/c4cp03391d), 2014-01-01
Supplement: c4cp03391d1.pdf [file c4cp03391d1.pdf]

## **Structural classification of the highly disordered crystal phases of**

**$[\text{N}_n][\text{BF}_4]$ ,  $[\text{N}_n][\text{PF}_6]$ ,  $[\text{P}_n][\text{BF}_4]$ , and  $[\text{P}_n][\text{PF}_6]$  salts ( $\text{N}_n^+$  =  
tetraalkylammonium and  $\text{P}_n^+$  = tetraalkylphosphonium)**

Kazuhiko Matsumoto,<sup>\*,a</sup> Ukyo Harinaga,<sup>a</sup> Ryo Tanaka,<sup>a</sup> Akira Koyama,<sup>a</sup> Rika Hagiwara,<sup>a</sup> and  
Katsuhiko Tsunashima,<sup>b</sup>

<sup>a</sup>Department of Fundamental Energy Science, Graduate School of Energy Science, Kyoto University  
Sakyo-ku, Kyoto 606-8501, Japan

<sup>b</sup>Department of Materials Science, Wakayama National College of Technology, 77 Noshima, Nada-  
cho, Gobo 644-0023, Japan

\* E-mail: k-matsumoto@energy.kyoto-u.ac.jp

### S-1. The CsCl'-type structure under the non-centrosymmetric space groups

The structure of the highest temperature solid phase of  $[\text{N}_1][\text{PF}_6]$  was classified into the CsCl'-type under the centrosymmetric group  $Im-3m$ . The other two possible non-centrosymmetric space groups,  $I432$  and  $I-43m$ , also give the similar structural type based on the following discussion.

In the case of  $I432$ , the same discussion with the case of  $Im-3m$  can be applied and the basic ion configuration under  $I432$  is identical to that under  $Im-3m$ . The difference between the two space groups is the site symmetry of each site, which affects the orientation of the ions.

Under  $I-43m$ , one of the ions occupies the  $2a$   $[(0,0,0)$  and  $(1/2, 1/2, 1/2)]$  and  $6b$   $[(1/2, 1/2, 0), (1/2, 0, 1/2), (0, 1/2, 1/2), (0, 0, 1/2), (0, 1/2, 0), \text{ and } (1/2, 0, 0)]$  sites as in the case of  $Im-3m$ , whereas the other occupies the  $8c$  site  $[(x,x,x), (-x,-x,x), (-x,x,-x), (x,-x,-x)$  and their  $(1/2,1/2,1/2)$  translated positions]. Although  $x$  in the  $8c$  site can deviate from  $1/4$ , it should not be large considering the interaction between the cation and anion.

## S-2 Calculations of ionic radii and the radius ratio for the highly disordered phases

Ionic radii in the highly disordered crystal structures (Table 3) were estimated from equations (1)–(4) in the main text. The followings are the details for each ion.

### $r(\text{PF}_6^-)$

$r(\text{PF}_6^-)$  was first obtained as an average of the three values from  $\text{K}[\text{PF}_6]$ ,  $\text{Rb}[\text{PF}_6]$ , and  $\text{Cs}[\text{PF}_6]$  using equation (1):

$$r(\text{PF}_6^-) \text{ from } \text{K}[\text{PF}_6] = (7.7891 / 2) - 1.52 = 2.37 \text{ \AA}$$

$$r(\text{PF}_6^-) \text{ from } \text{Rb}[\text{PF}_6] = (7.887 / 2) - 1.66 = 2.28 \text{ \AA}$$

$$r(\text{PF}_6^-) \text{ from } \text{Cs}[\text{PF}_6] = (8.197 / 2) - 1.81 = 2.29 \text{ \AA}$$

$$r(\text{PF}_6^-) = (2.37 + 2.28 + 2.29) / 3 = 2.31 \text{ \AA}$$

### $r(\text{N}_1^+)$

$r(\text{N}_1^+)$  was obtained from the equation (3) using  $r(\text{PF}_6^-) = 2.31 \text{ \AA}$ :

$$r(\text{N}_1^+) = (\sqrt[3]{12.59} / 4) - 2.31 = 3.14 \text{ \AA}$$

### $r(\text{N}_2^+)$

$r(\text{N}_2^+)$  was obtained from the equation (2) using  $r(\text{PF}_6^-) = 2.31 \text{ \AA}$ :

$$r(\text{N}_2^+) = (11.309 / 2) - 2.31 = 3.34 \text{ \AA}$$

### $r(\text{P}_2^+)$

$r(\text{P}_2^+)$  was obtained from the equation (2) using  $r(\text{PF}_6^-) = 2.31 \text{ \AA}$ :

$$r(\text{P}_2^+) = (11.845 / 2) - 2.31 = 3.61 \text{ \AA}$$

### $r(\text{N}_3^+)$

$r(\text{N}_3^+)$  was obtained from the equation (2) using  $r(\text{PF}_6^-) = 2.31 \text{ \AA}$ :

$$r(\text{N}_3^+) = (12.047 / 2) - 2.31 = 3.71 \text{ \AA}$$

**$r(\text{P}_3^+)$**

$r(\text{P}_3^+)$  was obtained from the equation (2) using  $r(\text{PF}_6^-) = 2.31 \text{ \AA}$ :

$$r(\text{P}_3^+) = [(9.702/\sqrt{2})^2 + (12.9888/4)^2]^{1/2} - 2.31 = 4.16 \text{ \AA}$$

**$r(\text{BF}_4^-)$**

$r(\text{BF}_4^-)$  was obtained from the  $a$  lattice parameters of  $[\text{N}_2][\text{BF}_4]$  (10.827 \AA) and  $[\text{P}_2][\text{BF}_4]$  (11.331 \AA) by analogy with equation (2):

$$r(\text{BF}_4^-) \text{ from } [\text{N}_2][\text{BF}_4] = (10.827 / 2) - 3.34 = 2.07 \text{ \AA}$$

$$r(\text{BF}_4^-) \text{ from } [\text{P}_2][\text{BF}_4] = (11.331 / 2) - 3.61 = 2.06 \text{ \AA}$$

where  $r(\text{N}_2^+) = 3.34 \text{ \AA}$  and  $r(\text{P}_2^+) = 3.61 \text{ \AA}$  were used.

The average of the two  $r(\text{BF}_4^-)$  values from these two equations was 2.07 \AA.

**S-3. Synthesis of  $[P_1][BF_4]$ :** The starting chloride,  $[P_1][Cl]$  (0.635 g, 4.98 mmol), dried under vacuum at 353 K was loaded in a PFA reactor in a drybox. A large excess of anhydrous HF (~2mL) was distilled onto  $[P_1][Cl]$  at 77 K under vacuum. On warming up to room temperature, the reaction proceeded and evolution of HCl was observed. The volatiles, HCl and excess HF, were removed by pumping at room temperature. This procedure (addition of large excess of anhydrous HF and elimination of the volatiles) was repeated once more to complete the reaction. Onto the obtained  $[P_1][(FH)_nF]$ , anhydrous HF as a solvent (~ 2mL) was condensed at 77 K. After warming up the reactor to room temperature, excess  $BF_3$  was introduced to the gas phase and the liquid phase was vigorously agitated for 3 h. The pressure inside the reactor was always monitored during this reaction and the uptake of  $BF_3$  was confirmed. The volatiles were removed under vacuum at room temperature for 1 h, at 323 K for 2 h, and at 353 K for 3h, giving  $[P_1][BF_4]$  as white powder (0.878 g, 4.94 mmol.). Raman (Figure S20) ( $\tilde{\nu}$  /  $cm^{-1}$ , intensity): 765(m) ( $BF_4^-$ ,  $\nu_1$ ). Elemental analysis calcd (%) for  $C_4H_{12}PBF_4$ : C 49.68, H 9.73; found: C 49.67, H, 9.68.

**Synthesis of  $[P_1][PF_6]$ :** This compound was prepared in the same manner as for  $[P_1][BF_4]$ , using  $[P_1][Cl]$  (0.444 g, 3.48 mmol) and  $PF_5$  instead of  $BF_3$ , which gave  $[P_1][PF_6]$  as white powder (0.822 g, 3.48 mmol). Raman (Figure S21) ( $\tilde{\nu}$  /  $cm^{-1}$ , intensity): 730(s) ( $PF_6^-$ ,  $\nu_1$ ), 564(w) ( $PF_6^-$ ,  $\nu_2$ ), 467(w) ( $PF_6^-$ ,  $\nu_5$ ). Elemental analysis calcd (%) for  $C_4H_{12}P_2F_6$ : C 20.36, H 5.09, F 48.31; found: C 20.17, H 5.00, F 48.48.

**Synthesis of  $[N_3][PF_6]$ :** The starting bromide,  $[N_3][Br]$  (1.33 g, 5.00 mmol), and  $K[PF_6]$  (1.01 g, 5.50 mmol) were agitated for 24 h in a polypropylene vessel containing  $CH_2Cl_2$  as solvent. The precipitated KBr was separated from the solution by centrifuging and the supernatant was washed with water four times. Removal of  $Br^-$  was confirmed by adding a 1M  $AgNO_3$  aqueous solution to the separated water phase after final washing. The volatiles were removed under vacuum at 298 K, at 313 K, 333 K, and 353 K (1d for each temperature), giving  $[N_3][BF_4]$  as white powder (0.822 g,

1.906 mmol). Raman (Figure S22) ( $\tilde{\nu}$  /  $\text{cm}^{-1}$ , intensity): 729(s) ( $\text{PF}_6^-$ ,  $\nu_1$ ), 563(w) ( $\text{PF}_6^-$ ,  $\nu_2$ ), 467(w) ( $\text{PF}_6^-$ ,  $\nu_5$ ). Elemental analysis calcd (%) for  $\text{C}_{12}\text{H}_{28}\text{NPF}_6$ : C 43.50, H 8.52 N 4.23, F 34.41; found: C 43.28, H 8.47 N 4.20, F 34.67.

**Synthesis of  $[\text{P}_3][\text{BF}_4]$ :** This compound was prepared in the same manner as for  $[\text{N}_3][\text{PF}_6]$ , using  $[\text{P}_3][\text{Br}]$  (1.42 g, 5.01 mmol) and  $\text{K}[\text{BF}_4]$  (0.630 g, 5.00 mmol), which gave  $[\text{P}_3][\text{BF}_4]$  as white powder (0.358 g, 1.23 mmol). Raman (Figure S23) (wavenumber /  $\text{cm}^{-1}$ , intensity): 765(m) ( $\text{BF}_4^-$ ,  $\nu_1$ ). Elemental analysis calcd (%) for  $\text{C}_{12}\text{H}_{28}\text{PBF}_4$ : C 49.68, H 9.78; found: C 49.67, H 9.68.

**Synthesis of  $[\text{P}_3][\text{PF}_6]$ :** This compound was prepared in the same manner as for  $[\text{N}_3][\text{PF}_6]$ , using  $[\text{P}_3][\text{Br}]$  (1.42 g, 5.01 mmol) and  $\text{K}[\text{PF}_6]$  (0.980 g, 5.32 mmol), which gave  $[\text{P}_3][\text{PF}_6]$  as white powder (1.420 g, 4.08 mmol). Raman (Figure S24) ( $\tilde{\nu}$  /  $\text{cm}^{-1}$ , intensity): 738(s) ( $\text{PF}_6^-$ ,  $\nu_1$ ), 564(w) ( $\text{PF}_6^-$ ,  $\nu_2$ ), 467(w) ( $\text{PF}_6^-$ ,  $\nu_5$ ). Elemental analysis calcd (%) for  $\text{C}_{12}\text{H}_{28}\text{P}_2\text{F}_6$ : C 41.41, H 8.05, F 32.75; found: C 41.20, H 8.30, F 32.63.

Table S1 Experimental and calculated  $d$  values ( $d_{\text{obs}}$  and  $d_{\text{calc}}$ ), the corresponding  $10^4 d^{-2}$  values, indices ( $h$ ,  $k$ , and  $l$ ), crystal system, lattice parameters ( $a$ ,  $c$ ,  $V$ ), and the number of formula unit per unit cell ( $Z$ ) for Phase I of  $[\text{N}_n][\text{BF}_4]$ ,  $[\text{N}_n][\text{PF}_6]$ ,  $[\text{P}_n][\text{BF}_4]$ , and  $[\text{P}_n][\text{PF}_6]$

$[\text{N}_1][\text{PF}_6]$  (563 K)

| $h$ | $K$ | $l$ | $d_{\text{obs}} / \text{\AA}$ | $d_{\text{calc}} / \text{\AA}$ | $10^4 d_{\text{obs}}^{-2} / \text{\AA}$ | $10^4 d_{\text{calc}}^{-2} / \text{\AA}$ | $I_{\text{obs}}$ |
|-----|-----|-----|-------------------------------|--------------------------------|-----------------------------------------|------------------------------------------|------------------|
| 1   | 1   | 0   | 8.457                         | 8.647                          | 139.8                                   | 133.7                                    | 0.3              |
| 2   | 0   | 0   | 6.220                         | 6.167                          | 258.5                                   | 262.9                                    | 16.4             |
| 2   | 1   | 1   | 5.096                         | 5.055                          | 385.1                                   | 391.3                                    | 3.5              |
| 2   | 2   | 0   | 4.405                         | 4.388                          | 515.4                                   | 519.4                                    | 100.0            |
| 2   | 2   | 2   | 3.590                         | 3.592                          | 775.9                                   | 775.0                                    | 0.6              |
| 3   | 2   | 1   | 3.329                         | 3.329                          | 902.3                                   | 902.3                                    | 1.1              |
| 4   | 0   | 0   | 3.113                         | 3.116                          | 1031.9                                  | 1029.9                                   | 3.3              |
| 3   | 3   | 0   | 2.944                         | 2.940                          | 1153.8                                  | 1156.9                                   | 1.4              |
| 4   | 2   | 0   | 2.785                         | 2.791                          | 1289.3                                  | 1283.7                                   | 0.4              |

Cubic,  $a = 12.59(2) \text{\AA}$ ,  $V = 1995(5) \text{\AA}^3$ ,  $Z = 8$ .

$[\text{N}_2][\text{BF}_4]$  (373 K)

| $h$ | $K$ | $l$ | $d_{\text{obs}} / \text{\AA}$ | $d_{\text{calc}} / \text{\AA}$ | $10^4 d_{\text{obs}}^{-2} / \text{\AA}$ | $10^4 d_{\text{calc}}^{-2} / \text{\AA}$ | $I_{\text{obs}}$ |
|-----|-----|-----|-------------------------------|--------------------------------|-----------------------------------------|------------------------------------------|------------------|
| 1   | 1   | 1   | 6.241                         | 6.226                          | 256.7                                   | 258.0                                    | 0.8              |
| 2   | 0   | 0   | 5.381                         | 5.394                          | 345.4                                   | 343.7                                    | 100.0            |
| 2   | 2   | 0   | 3.818                         | 3.818                          | 686.0                                   | 686.0                                    | 20.7             |
| 3   | 1   | 1   | 3.259                         | 3.258                          | 941.5                                   | 942.1                                    | 4.3              |
| 2   | 2   | 2   | 3.119                         | 3.119                          | 1027.9                                  | 1027.9                                   | 3.7              |

Cubic,  $a = 10.827(6) \text{\AA}$ ,  $V = 1269.1(12) \text{\AA}^3$ ,  $Z = 4$ .

$[\text{N}_2][\text{PF}_6]$  (373 K)

| $h$ | $k$ | $l$ | $d_{\text{obs}} / \text{\AA}$ | $d_{\text{calc}} / \text{\AA}$ | $10^4 d_{\text{obs}}^{-2} / \text{\AA}$ | $10^4 d_{\text{calc}}^{-2} / \text{\AA}$ | $I_{\text{obs}}$ |
|-----|-----|-----|-------------------------------|--------------------------------|-----------------------------------------|------------------------------------------|------------------|
| 1   | 1   | 1   | 6.647                         | 6.608                          | 226.3                                   | 229.0                                    | 8.8              |
| 2   | 0   | 0   | 5.751                         | 5.723                          | 302.4                                   | 305.3                                    | 100.0            |
| 2   | 2   | 0   | 4.051                         | 4.046                          | 609.4                                   | 610.9                                    | 29.4             |
| 3   | 1   | 1   | 3.440                         | 3.451                          | 845.1                                   | 839.7                                    | 8.4              |
| 2   | 2   | 2   | 3.300                         | 3.303                          | 918.3                                   | 916.6                                    | 5.2              |

Cubic,  $a = 11.309(2) \text{\AA}$ ,  $V = 1446.3(4) \text{\AA}^3$ ,  $Z = 4$ .

$[\text{P}_2][\text{BF}_4]$  (473 K)

| $h$ | $k$ | $l$ | $d_{\text{obs}} / \text{\AA}$ | $d_{\text{calc}} / \text{\AA}$ | $10^4 d_{\text{obs}}^{-2} / \text{\AA}$ | $10^4 d_{\text{calc}}^{-2} / \text{\AA}$ | $I_{\text{obs}}$ |
|-----|-----|-----|-------------------------------|--------------------------------|-----------------------------------------|------------------------------------------|------------------|
|-----|-----|-----|-------------------------------|--------------------------------|-----------------------------------------|------------------------------------------|------------------|

|   |   |   |       |       |       |       |       |
|---|---|---|-------|-------|-------|-------|-------|
| 1 | 1 | 1 | 6.585 | 6.591 | 230.6 | 230.2 | 2.5   |
| 2 | 0 | 0 | 5.718 | 5.702 | 305.9 | 307.6 | 100.0 |
| 2 | 2 | 0 | 4.016 | 4.024 | 620.0 | 617.6 | 24.3  |
| 3 | 1 | 1 | 3.424 | 3.430 | 853.0 | 850.0 | 2.7   |
| 2 | 2 | 2 | 3.291 | 3.283 | 923.3 | 927.8 | 2.7   |

Cubic,  $a = 11.331(11)$  Å,  $V = 1455(2)$  Å<sup>3</sup>,  $Z = 4$ .

---

[P<sub>2</sub>][PF<sub>6</sub>] (498 K)

| $h$ | $k$ | $l$ | $d_{\text{obs}} / \text{Å}$ | $d_{\text{calc}} / \text{Å}$ | $10^4 d_{\text{obs}}^{-2} / \text{Å}$ | $10^4 d_{\text{calc}}^{-2} / \text{Å}$ | $I_{\text{obs}}$ |
|-----|-----|-----|-----------------------------|------------------------------|---------------------------------------|----------------------------------------|------------------|
| 1   | 1   | 1   | 6.845                       | 6.842                        | 213.4                                 | 213.6                                  | 7.2              |
| 2   | 0   | 0   | 5.922                       | 5.925                        | 285.1                                 | 284.9                                  | 100.0            |
| 2   | 2   | 0   | 4.188                       | 4.189                        | 570.1                                 | 569.9                                  | 26.7             |
| 3   | 1   | 1   | 3.574                       | 3.572                        | 782.9                                 | 783.7                                  | 3.4              |
| 2   | 2   | 2   | 3.419                       | 3.420                        | 855.5                                 | 855.0                                  | 3.4              |

Cubic,  $a = 11.845(2)$  Å,  $V = 1661.7(5)$  Å<sup>3</sup>,  $Z = 4$ .

---

[N<sub>3</sub>][BF<sub>4</sub>] (453 K)

| $h$ | $k$ | $l$ | $d_{\text{obs}} / \text{Å}$ | $d_{\text{calc}} / \text{Å}$ | $10^4 d_{\text{obs}}^{-2} / \text{Å}$ | $10^4 d_{\text{calc}}^{-2} / \text{Å}$ | $I_{\text{obs}}$ |
|-----|-----|-----|-----------------------------|------------------------------|---------------------------------------|----------------------------------------|------------------|
| 1   | 1   | 0   | 9.787                       | 9.788                        | 104.4                                 | 104.4                                  | 100.0            |
| 2   | 0   | 0   | 6.960                       | 6.962                        | 206.4                                 | 206.3                                  | 6.9              |
| 2   | 1   | 0   | 6.247                       | 6.237                        | 256.2                                 | 257.1                                  | 2.5              |
| 2   | 1   | 1   | 5.692                       | 5.700                        | 308.7                                 | 307.8                                  | 17.0             |
| 2   | 2   | 0   | 4.947                       | 4.944                        | 408.6                                 | 409.1                                  | 30.2             |
| 3   | 1   | 0   | 4.421                       | 4.427                        | 511.6                                 | 510.2                                  | 2.6              |
| 2   | 2   | 2   | 4.047                       | 4.045                        | 610.6                                 | 611.2                                  | 7.7              |
| 3   | 2   | 0   | 3.889                       | 3.886                        | 661.2                                 | 662.2                                  | 14.8             |
| 3   | 2   | 1   | 3.754                       | 3.747                        | 709.6                                 | 712.3                                  | 11.2             |
| 4   | 0   | 0   | 3.502                       | 3.507                        | 815.4                                 | 813.1                                  | 3.7              |
| 3   | 3   | 0   | 3.306                       | 3.308                        | 914.9                                 | 913.8                                  | 4.4              |

Cubic,  $a = 14.129(6)$  Å,  $V = 2820(2)$  Å<sup>3</sup>,  $Z = 6$ .

---

[N<sub>3</sub>][PF<sub>6</sub>] (493 K)

| $h$ | $k$ | $l$ | $d_{\text{obs}} / \text{Å}$ | $d_{\text{calc}} / \text{Å}$ | $10^4 d_{\text{obs}}^{-2} / \text{Å}$ | $10^4 d_{\text{calc}}^{-2} / \text{Å}$ | $I_{\text{obs}}$ |
|-----|-----|-----|-----------------------------|------------------------------|---------------------------------------|----------------------------------------|------------------|
| 1   | 1   | 0   | 8.374                       | 8.418                        | 142.6                                 | 141.1                                  | 72.6             |
| 1   | 1   | 1   | 6.887                       | 6.888                        | 210.8                                 | 210.8                                  | 10.2             |
| 2   | 0   | 0   | 6.028                       | 5.973                        | 275.2                                 | 280.3                                  | 59.7             |
| 2   | 1   | 1   | 4.882                       | 4.885                        | 419.6                                 | 419.1                                  | 100.0            |
| 2   | 2   | 0   | 4.212                       | 4.234                        | 563.7                                 | 557.8                                  | 32.3             |



|   |   |   |       |       |       |       |      |
|---|---|---|-------|-------|-------|-------|------|
| 2 | 2 | 1 | 3.975 | 3.993 | 632.9 | 627.2 | 32.3 |
| 3 | 1 | 0 | 3.788 | 3.790 | 696.9 | 696.2 | 25.0 |
| 3 | 1 | 1 | 3.622 | 3.614 | 762.3 | 765.6 | 2.8  |
| 2 | 2 | 2 | 3.462 | 3.461 | 834.3 | 834.8 | 2.7  |

Cubic,  $a = 12.047(16)$  Å,  $V = 1748(4)$  Å<sup>3</sup>,  $Z = 4$ .

---

[P<sub>3</sub>][BF<sub>4</sub>] (423 K)

| $h$ | $k$ | $l$ | $d_{\text{obs}} / \text{Å}$ | $d_{\text{calc}} / \text{Å}$ | $10^4 d_{\text{obs}}^{-2} / \text{Å}$ | $10^4 d_{\text{calc}}^{-2} / \text{Å}$ | $I_{\text{obs}}$ |
|-----|-----|-----|-----------------------------|------------------------------|---------------------------------------|----------------------------------------|------------------|
| 1   | 1   | 0   | 10.159                      | 10.175                       | 96.9                                  | 96.6                                   | 100.0            |
| 2   | 0   | 0   | 7.197                       | 7.181                        | 193.1                                 | 193.9                                  | 7.8              |
| 2   | 1   | 0   | 6.427                       | 6.420                        | 242.1                                 | 242.6                                  | 7.2              |
| 2   | 1   | 1   | 5.847                       | 5.859                        | 292.5                                 | 291.3                                  | 20.8             |
| 2   | 2   | 0   | 5.074                       | 5.071                        | 388.4                                 | 388.9                                  | 40.7             |
| 3   | 1   | 0   | 4.531                       | 4.534                        | 487.1                                 | 486.4                                  | 4.3              |
| 2   | 2   | 2   | 4.134                       | 4.138                        | 585.1                                 | 584.0                                  | 8.5              |
| 3   | 2   | 0   | 3.979                       | 3.975                        | 631.6                                 | 632.9                                  | 41.5             |
| 3   | 2   | 1   | 3.836                       | 3.830                        | 679.6                                 | 681.7                                  | 23.5             |
| 4   | 0   | 0   | 3.579                       | 3.582                        | 780.7                                 | 779.4                                  | 9.5              |
| 3   | 3   | 0   | 3.368                       | 3.377                        | 881.6                                 | 876.9                                  | 8.8              |

Cubic,  $a = 14.298(6)$  Å,  $V = 2923(2)$  Å<sup>3</sup>,  $Z = 6$ .

---

[P<sub>3</sub>][PF<sub>6</sub>] (473 K)

| $h$ | $k$ | $l$ | $d_{\text{obs}} / \text{Å}$ | $d_{\text{calc}} / \text{Å}$ | $10^4 d_{\text{obs}}^{-2} / \text{Å}$ | $10^4 d_{\text{calc}}^{-2} / \text{Å}$ | $I_{\text{obs}}$ |
|-----|-----|-----|-----------------------------|------------------------------|---------------------------------------|----------------------------------------|------------------|
| 1   | 0   | 0   | 8.281                       | 8.287                        | 145.8                                 | 145.6                                  | 100.0            |
| 1   | 0   | 1   | 6.965                       | 6.958                        | 206.1                                 | 206.6                                  | 1.1              |
| 0   | 0   | 2   | 6.379                       | 6.376                        | 245.8                                 | 246.0                                  | 21.0             |
| 1   | 0   | 2   | 5.064                       | 5.071                        | 390.0                                 | 388.9                                  | 9.7              |
| 1   | 1   | 0   | 4.816                       | 4.813                        | 431.1                                 | 431.7                                  | 30.6             |
| 2   | 0   | 0   | 4.173                       | 4.173                        | 574.3                                 | 574.3                                  | 10.6             |
| 2   | 0   | 1   | 3.965                       | 3.969                        | 636.1                                 | 634.8                                  | 9.7              |
| 1   | 1   | 2   | 3.855                       | 3.851                        | 672.9                                 | 674.3                                  | 3.6              |

Hexagonal,  $a = 9.702(4)$  Å,  $c = 12.888(11)$  Å,  $V = 1050.7(11)$  Å<sup>3</sup>,  $Z = 2$ .

---

[N<sub>4</sub>][BF<sub>4</sub>] (413 K)

| $H$ | $k$ | $l$ | $d_{\text{obs}} / \text{Å}$ | $d_{\text{calc}} / \text{Å}$ | $10^4 d_{\text{obs}}^{-2} / \text{Å}$ | $10^4 d_{\text{calc}}^{-2} / \text{Å}$ | $I_{\text{obs}}$ |
|-----|-----|-----|-----------------------------|------------------------------|---------------------------------------|----------------------------------------|------------------|
| 1   | 1   | 0   | 10.657                      | 10.677                       | 88.1                                  | 87.7                                   | 100.0            |
| 2   | 0   | 0   | 7.554                       | 7.527                        | 175.2                                 | 176.5                                  | 4.8              |
| 2   | 1   | 0   | 6.738                       | 6.736                        | 220.3                                 | 220.4                                  | 5.9              |

|   |   |   |       |       |       |       |      |
|---|---|---|-------|-------|-------|-------|------|
| 2 | 1 | 1 | 6.153 | 6.143 | 264.1 | 265.0 | 14.6 |
| 2 | 2 | 0 | 5.342 | 5.319 | 350.4 | 353.5 | 14.9 |
| 3 | 1 | 0 | 4.757 | 4.759 | 441.9 | 441.5 | 1.4  |
| 2 | 2 | 2 | 4.342 | 4.341 | 530.4 | 530.7 | 23.8 |
| 3 | 2 | 0 | 4.167 | 4.169 | 575.9 | 575.4 | 13.6 |
| 3 | 2 | 1 | 4.02  | 4.019 | 618.8 | 619.1 | 6.5  |
| 4 | 0 | 0 | 3.751 | 3.755 | 710.7 | 709.2 | 6.4  |
| 3 | 3 | 0 | 3.539 | 3.540 | 798.4 | 798.0 | 3.0  |

Cubic,  $a = 14.971(8)$  Å,  $V = 3353(3)$  Å<sup>3</sup>,  $Z = 6$ .

---

[N<sub>4</sub>][PF<sub>6</sub>] (413 K)

| $h$ | $k$ | $l$ | $d_{\text{obs}} / \text{Å}$ | $d_{\text{calc}} / \text{Å}$ | $10^4 d_{\text{obs}}^{-2} / \text{Å}$ | $10^4 d_{\text{calc}}^{-2} / \text{Å}$ | $I_{\text{obs}}$ |
|-----|-----|-----|-----------------------------|------------------------------|---------------------------------------|----------------------------------------|------------------|
| 1   | 1   | 0   | 10.827                      | 10.824                       | 85.3                                  | 85.4                                   | 100.0            |
| 2   | 0   | 0   | 7.666                       | 7.661                        | 170.2                                 | 170.4                                  | 6.6              |
| 2   | 1   | 0   | 6.851                       | 6.854                        | 213.1                                 | 212.9                                  | 3.8              |
| 2   | 1   | 1   | 6.258                       | 6.258                        | 255.3                                 | 255.3                                  | 12.9             |
| 2   | 2   | 0   | 5.420                       | 5.421                        | 340.4                                 | 340.3                                  | 15.1             |
| 3   | 1   | 0   | 4.849                       | 4.849                        | 425.3                                 | 425.3                                  | 4.9              |
| 2   | 2   | 2   | 4.429                       | 4.427                        | 509.8                                 | 510.2                                  | 17.3             |
| 3   | 2   | 0   | 4.253                       | 4.254                        | 552.9                                 | 552.6                                  | 16.1             |
| 3   | 2   | 1   | 4.099                       | 4.099                        | 595.2                                 | 595.2                                  | 8.6              |
| 4   | 0   | 0   | 3.835                       | 3.835                        | 679.9                                 | 679.9                                  | 3.7              |
| 3   | 3   | 0   | 3.616                       | 3.616                        | 764.8                                 | 764.8                                  | 1.5              |

Cubic,  $a = 15.3538(13)$  Å,  $V = 3619.5(5)$  Å<sup>3</sup>,  $Z = 6$ .

---

[P<sub>4</sub>][BF<sub>4</sub>] (348 K)

| $h$ | $k$ | $l$ | $d_{\text{obs}} / \text{Å}$ | $d_{\text{calc}} / \text{Å}$ | $10^4 d_{\text{obs}}^{-2} / \text{Å}$ | $10^4 d_{\text{calc}}^{-2} / \text{Å}$ | $I_{\text{obs}}$ |
|-----|-----|-----|-----------------------------|------------------------------|---------------------------------------|----------------------------------------|------------------|
| 1   | 1   | 0   | 10.608                      | 10.623                       | 88.9                                  | 88.6                                   | 100.0            |
| 2   | 0   | 0   | 7.538                       | 7.523                        | 176.0                                 | 176.7                                  | 5.1              |
| 2   | 1   | 0   | 6.743                       | 6.731                        | 219.9                                 | 220.7                                  | 8.7              |
| 2   | 1   | 1   | 6.129                       | 6.146                        | 266.2                                 | 264.7                                  | 14.0             |
| 2   | 2   | 0   | 5.317                       | 5.325                        | 353.7                                 | 352.7                                  | 21.2             |
| 3   | 1   | 0   | 4.765                       | 4.764                        | 440.4                                 | 440.6                                  | 8.7              |
| 2   | 2   | 2   | 4.362                       | 4.35                         | 525.6                                 | 528.5                                  | 31.3             |
| 3   | 2   | 0   | 4.179                       | 4.179                        | 572.6                                 | 572.6                                  | 10.0             |
| 3   | 2   | 1   | 4.023                       | 4.028                        | 617.9                                 | 616.3                                  | 12.3             |
| 4   | 0   | 0   | 3.766                       | 3.768                        | 705.1                                 | 704.3                                  | 3.8              |
| 3   | 3   | 0   | 3.560                       | 3.553                        | 789.0                                 | 792.2                                  | 3.1              |

Cubic,  $a = 15.097(8) \text{ \AA}$ ,  $V = 3440(3) \text{ \AA}^3$ ,  $Z = 6$ .

---

[P<sub>4</sub>][PF<sub>6</sub>] (338 K)

| $h$ | $k$ | $l$ | $d_{\text{obs}} / \text{\AA}$ | $d_{\text{calc}} / \text{\AA}$ | $10^4 d_{\text{obs}}^{-2} / \text{\AA}$ | $10^4 d_{\text{calc}}^{-2} / \text{\AA}$ | $I_{\text{obs}}$ |
|-----|-----|-----|-------------------------------|--------------------------------|-----------------------------------------|------------------------------------------|------------------|
| 1   | 1   | 0   | 10.782                        | 10.814                         | 86.0                                    | 85.5                                     | 75.1             |
| 2   | 0   | 0   | 7.670                         | 7.650                          | 170.0                                   | 170.9                                    | 13.4             |
| 2   | 1   | 0   | 6.849                         | 6.843                          | 213.2                                   | 213.6                                    | 5.1              |
| 2   | 1   | 1   | 6.247                         | 6.247                          | 256.2                                   | 256.2                                    | 51.6             |
| 2   | 2   | 0   | 5.405                         | 5.411                          | 342.3                                   | 341.5                                    | 82.5             |
| 3   | 1   | 0   | 4.835                         | 4.840                          | 427.8                                   | 426.9                                    | 22.6             |
| 2   | 2   | 2   | 4.421                         | 4.418                          | 511.6                                   | 512.3                                    | 100.0            |
| 3   | 2   | 0   | 4.247                         | 4.245                          | 554.4                                   | 554.9                                    | 79.7             |
| 3   | 2   | 1   | 4.098                         | 4.091                          | 595.5                                   | 597.5                                    | 66.4             |
| 4   | 0   | 0   | 3.820                         | 3.827                          | 685.3                                   | 682.8                                    | 24.0             |
| 3   | 3   | 0   | 3.608                         | 3.608                          | 768.2                                   | 768.2                                    | 12.0             |

Cubic,  $a = 15.315(7) \text{ \AA}$ ,  $V = 3592(3) \text{ \AA}^3$ ,  $Z = 6$ .

---

Table S2 Experimental and calculated  $d$  values ( $d_{\text{obs}}$  and  $d_{\text{calc}}$ ), the corresponding  $10^4 d^{-2}$  values, indices ( $h$ ,  $k$ , and  $l$ ), crystal system, lattice parameters ( $a$ ,  $c$ ,  $V$ ), and the number of formula unit per unit cell ( $Z$ ) for Phase II of  $[\text{N}_1][\text{PF}_6]$

| [N <sub>1</sub> ][PF <sub>6</sub> ] (298 K) |          |          |                             |                              |                                                           |                                                            |                         |
|---------------------------------------------|----------|----------|-----------------------------|------------------------------|-----------------------------------------------------------|------------------------------------------------------------|-------------------------|
| <i>h</i>                                    | <i>k</i> | <i>l</i> | <i>d</i> <sub>obs</sub> / Å | <i>d</i> <sub>calc</sub> / Å | 10 <sup>4</sup> <i>d</i> <sub>obs</sub> <sup>-2</sup> / Å | 10 <sup>4</sup> <i>d</i> <sub>calc</sub> <sup>-2</sup> / Å | <i>I</i> <sub>obs</sub> |
| 1                                           | 1        | 0        | 8.30                        | 8.38                         | 145.2                                                     | 142.4                                                      | 1.3                     |
| 0                                           | 0        | 1        | 5.99                        | 6.10                         | 278.7                                                     | 268.7                                                      | 24.8                    |
| 1                                           | 0        | 1        | 4.97                        | 4.96                         | 404.8                                                     | 406.5                                                      | 13.8                    |
| 1                                           | 1        | 1        | 4.31                        | 4.29                         | 538.3                                                     | 543.4                                                      | 100.0                   |
| 2                                           | 1        | 1        | 3.25                        | 3.24                         | 946.7                                                     | 952.6                                                      | 6.2                     |
| 0                                           | 0        | 2        | 3.08                        | 3.08                         | 1054.1                                                    | 1054.1                                                     | 0.4                     |
| 2                                           | 2        | 0        | 3.01                        | 3.02                         | 1103.7                                                    | 1096.4                                                     | 3.3                     |
| 1                                           | 0        | 2        | 2.90                        | 2.90                         | 1189.1                                                    | 1189.1                                                     | 4.1                     |
| 2                                           | 2        | 1        | 2.70                        | 2.71                         | 1371.7                                                    | 1361.6                                                     | 1.2                     |
| 3                                           | 0        | 1        | 2.59                        | 2.59                         | 1490.7                                                    | 1490.7                                                     | 2.8                     |

Tetragonal,  $a = 8.625(10)$  Å,  $c = 6.227(8)$  Å,  $V = 463.2(9)$  Å<sup>3</sup>,  $Z = 2$

Table S3 Crystallographic data and refinement results for [P<sub>4</sub>][PF<sub>6</sub>] at 113, 243, and 273 K.

|                                                                                   | [P <sub>4</sub> ][PF <sub>6</sub> ] at 113 K                  | [P <sub>4</sub> ][PF <sub>6</sub> ] at 243 K                  | [P <sub>4</sub> ][PF <sub>6</sub> ] at 273 K                  |
|-----------------------------------------------------------------------------------|---------------------------------------------------------------|---------------------------------------------------------------|---------------------------------------------------------------|
| Formula                                                                           | C <sub>16</sub> H <sub>36</sub> F <sub>6</sub> P <sub>2</sub> | C <sub>16</sub> H <sub>36</sub> F <sub>6</sub> P <sub>2</sub> | C <sub>16</sub> H <sub>36</sub> F <sub>6</sub> P <sub>2</sub> |
| Fw                                                                                | 404.39                                                        | 404.39                                                        | 404.39                                                        |
| crystal size, mm                                                                  | 0.20×0.20×0.60                                                | 0.20×0.20×0.60                                                | 0.20×0.20×0.60                                                |
| <i>T</i> /K                                                                       | 113                                                           | 243                                                           | 273                                                           |
| crystal system                                                                    | monoclinic                                                    | monoclinic                                                    | orthorhombic                                                  |
| space group                                                                       | <i>P</i> 2 <sub>1</sub> / <i>c</i>                            | <i>P</i> 2 <sub>1</sub> / <i>c</i>                            | <i>Pm</i> <i>cn</i>                                           |
| <i>a</i> /Å                                                                       | 9.7465(2)                                                     | 9.8567(12)                                                    | 9.9807(9)                                                     |
| <i>b</i> /Å                                                                       | 14.0652(4)                                                    | 14.1385(17)                                                   | 13.8901(15)                                                   |
| <i>c</i> /Å                                                                       | 15.5029(4)                                                    | 15.777(2)                                                     | 16.2367(16)                                                   |
| <i>β</i> /deg                                                                     | 93.2170(10)                                                   | 92.422(3)                                                     | —                                                             |
| <i>V</i> /Å <sup>3</sup>                                                          | 2121.89(9)                                                    | 2196.6(5)                                                     | 2250.9(4)                                                     |
| <i>Z</i>                                                                          | 4                                                             | 4                                                             | 4                                                             |
| $\rho_{\text{calcd}}$ /g cm <sup>−3</sup>                                         | 1.266                                                         | 1.223                                                         | 1.193                                                         |
| 2 $\theta_{\text{max}}$ /deg                                                      | 54.96                                                         | 54.96                                                         | 54.96                                                         |
| Data completeness                                                                 | 0.998                                                         | 0.998                                                         | 0.998                                                         |
| <i>F</i> (000)                                                                    | 864                                                           | 864                                                           | 864                                                           |
| $\mu$ /mm <sup>−1</sup>                                                           | 0.252                                                         | 0.243                                                         | 0.237                                                         |
| $\lambda$ /Å                                                                      | 0.71073                                                       | 0.71073                                                       | 0.71073                                                       |
| <i>T</i> <sub>min</sub> / <i>T</i> <sub>max</sub>                                 | 1.000/0.829                                                   | 1.000/0.875                                                   | 1.000/0.626                                                   |
| No. reflns collected, unique                                                      | 20375, 4863                                                   | 20860, 5030                                                   | 21352, 2715                                                   |
| No. reflns in refinement                                                          | 4863                                                          | 5030                                                          | 2715                                                          |
| No. parameters, restraints                                                        | 221, 0                                                        | 298, 255                                                      | 197, 107                                                      |
| <i>R</i> <sub>int</sub>                                                           | 0.0192                                                        | 0.0523                                                        | 0.0249                                                        |
| <i>R</i> <sub>1</sub> ( <i>F</i> <sub>o</sub> ) <sup><i>a</i></sup>               | 0.0398                                                        | 0.0624                                                        | 0.0951                                                        |
| <i>wR</i> <sub>2</sub> ( <i>F</i> <sub>o</sub> <sup>2</sup> ) <sup><i>b</i></sup> | 0.1041                                                        | 0.1840                                                        | 0.3034                                                        |
| Goodness-of-fit on <i>F</i> <sup>2</sup>                                          | 1.060                                                         | 1.098                                                         | 1.137                                                         |
| Largest difference peak, hole / e Å <sup>−3</sup>                                 | 0.679, −0.385                                                 | 0.575, −0.377                                                 | 0.513, −0.308                                                 |
| CCDC No.                                                                          | 1010901                                                       | 1010902                                                       | 1010903                                                       |

<sup>*a*</sup>  $R_1 = \sum ||F_o| - |F_c|| / \sum |F_o|$  for  $I > 2\sigma(I)$ . <sup>*b*</sup>  $wR_2 = \{\sum [w(F_o^2 - F_c^2)^2] / \sum [w(F_o^2)^2]\}^{1/2}$  for  $I > 2\sigma(I)$ .

Table S4 Crystallographic data and refinement results for [P<sub>4</sub>][PF<sub>6</sub>] at 333 K.<sup>a</sup>

| [P <sub>4</sub> ][PF <sub>6</sub> ] at 333 K                               |                                                               |
|----------------------------------------------------------------------------|---------------------------------------------------------------|
| Formula                                                                    | C <sub>16</sub> H <sub>36</sub> F <sub>6</sub> P <sub>2</sub> |
| Fw                                                                         | 404.39                                                        |
| crystal size, mm                                                           | 0.10×0.10×0.10                                                |
| <i>T</i> /K                                                                | 333                                                           |
| crystal system                                                             | Cubic                                                         |
| space group                                                                | <i>Pm</i> −3 <i>n</i>                                         |
| <i>a</i> /Å                                                                | 15.142(17)                                                    |
| <i>V</i> /Å <sup>3</sup>                                                   | 3472(7)                                                       |
| <i>Z</i>                                                                   | 6                                                             |
| $\rho_{\text{calcd}}/\text{g cm}^{-3}$                                     | 1.161                                                         |
| $2\theta_{\text{max}}/\text{deg}$                                          | 29.92                                                         |
| Data completeness                                                          | 0.979                                                         |
| F(000)                                                                     | 1296                                                          |
| $\mu/\text{mm}^{-1}$                                                       | 0.231                                                         |
| $\lambda/\text{Å}$                                                         | 0.71073                                                       |
| <i>T</i> <sub>min</sub> / <i>T</i> <sub>max</sub>                          | 0.004, 1.000                                                  |
| No. reflns collected, unique                                               | 8698, 143                                                     |
| No. reflns in refinement                                                   | 143                                                           |
| No. parameters, restraints                                                 | 16, 9                                                         |
| <i>R</i> <sub>int</sub>                                                    | 0.183                                                         |
| <i>R</i> <sub>1</sub> ( <i>F</i> <sub>o</sub> ) <sup>b</sup>               | 0.3071                                                        |
| <i>wR</i> <sub>2</sub> ( <i>F</i> <sub>o</sub> <sup>2</sup> ) <sup>c</sup> | 0.6570                                                        |
| Goodness-of-fit on <i>F</i> <sup>2</sup>                                   | 1.812                                                         |
| Largest difference peak, hole / e Å <sup>−3</sup>                          | 0.229, −0.174                                                 |

<sup>a</sup>The structure was not fully solved and refined due to the highly disordered structure at 333 K. <sup>b</sup>  $R_1 = \sum ||F_o| - |F_c|| / \sum |F_o|$  for  $I > 2\sigma(I)$ . <sup>c</sup>  $wR_2 = \{\sum [w(F_o^2 - F_c^2)^2] / \sum [w(F_o^2)^2]\}^{1/2}$  for  $I > 2\sigma(I)$ .

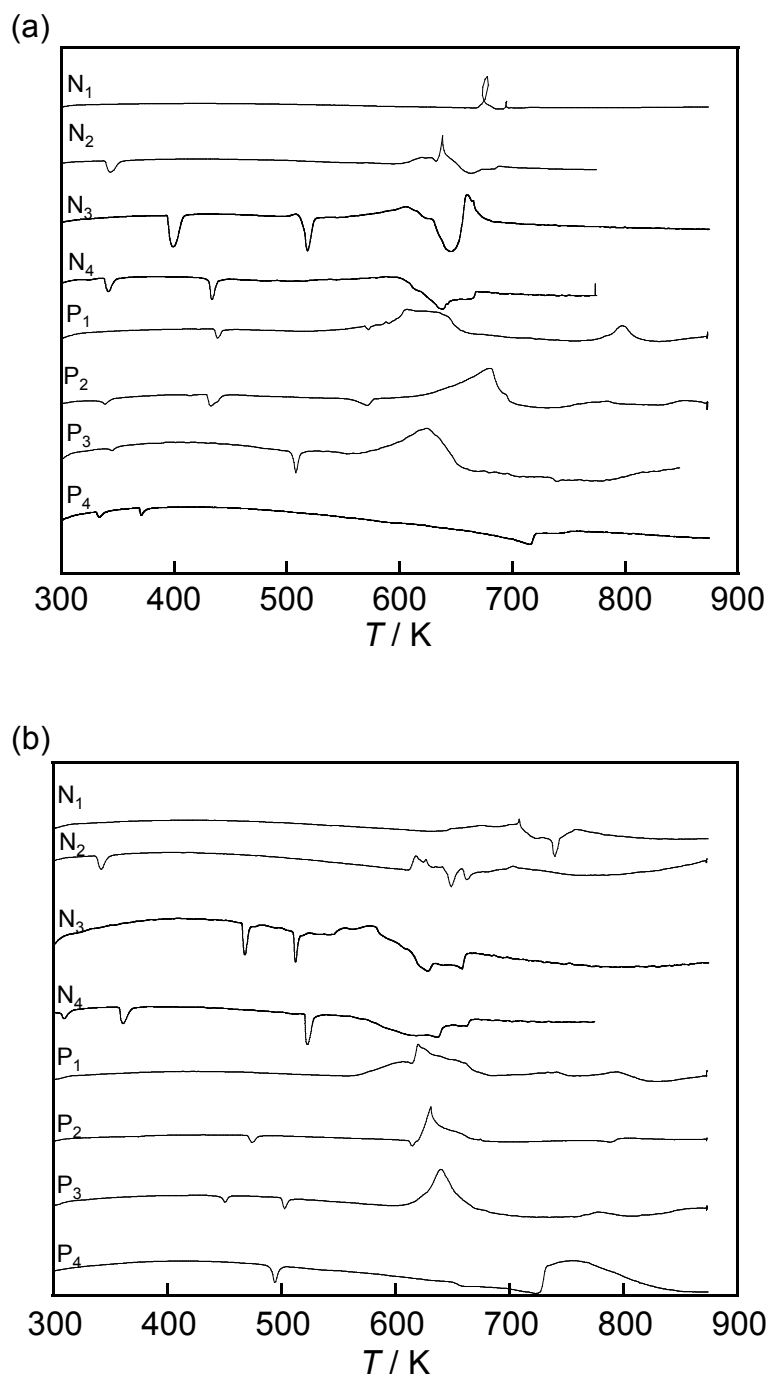

Figure S1 Differential thermal analysis curves for (a)  $[N_n][BF_4]$  and  $[P_n][BF_4]$  and (b)  $[N_n][PF_6]$  and  $[P_n][PF_6]$ . Scan rate:  $5\text{ K min}^{-1}$ .

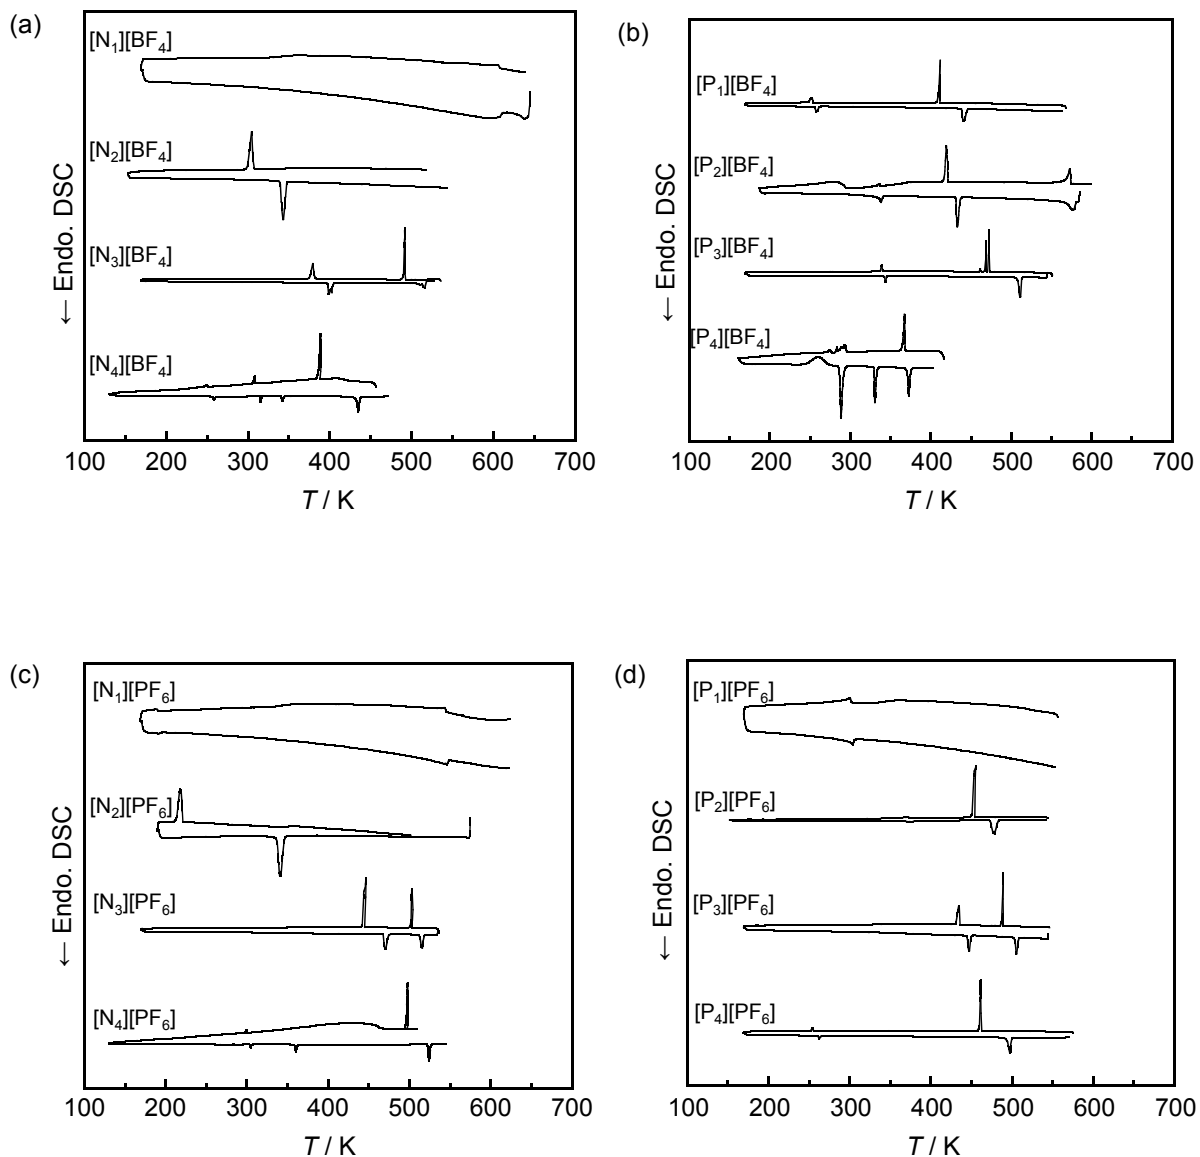

Figure S2 Differential scanning calorimetric curves of (a)  $[N_n][BF_4]$ , (b)  $[P_n][BF_4]$ , (c)  $[N_n][PF_6]$ , and (d)  $[P_n][PF_6]$ . Scan rate: 5 K min<sup>-1</sup>.



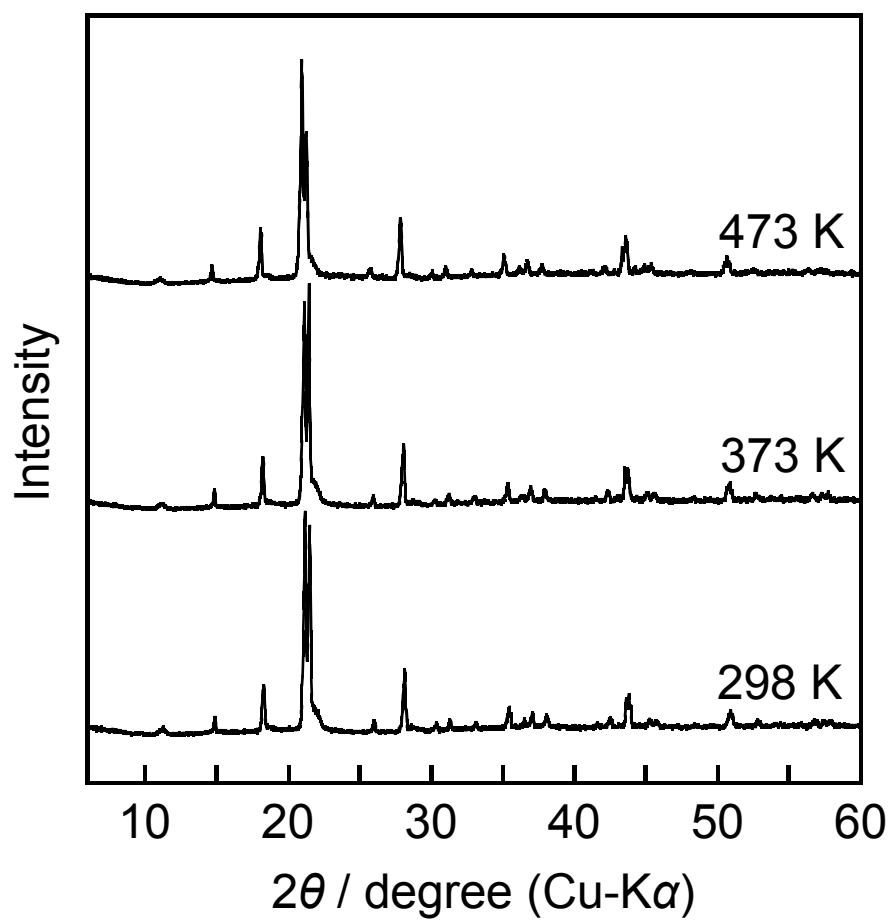

Figure S3 Powder XRD patterns of Phase II at 473 K, Phase II at 373 K, and Phase II at 298 K for  $[N_1][BF_4]$ .

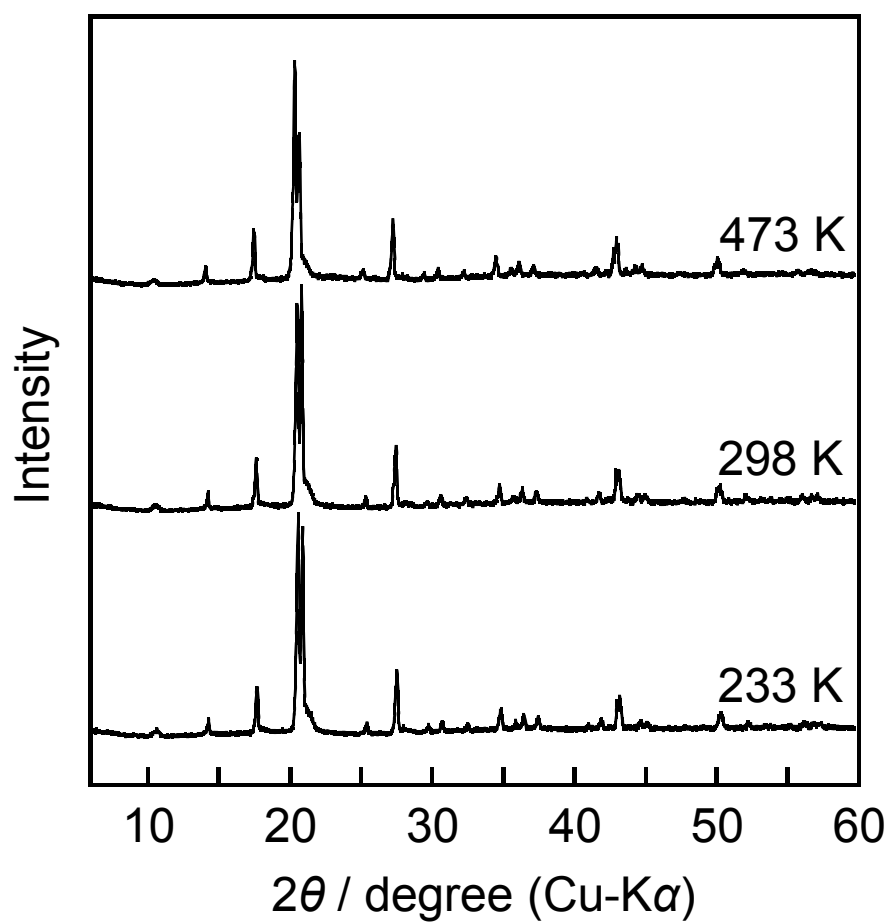

Figure S4 Powder XRD patterns of (a) Phase II at 473 K, (b) Phase III at 298 K, and (c) Phase IV at 233 K for  $[P_1][BF_4]$ .

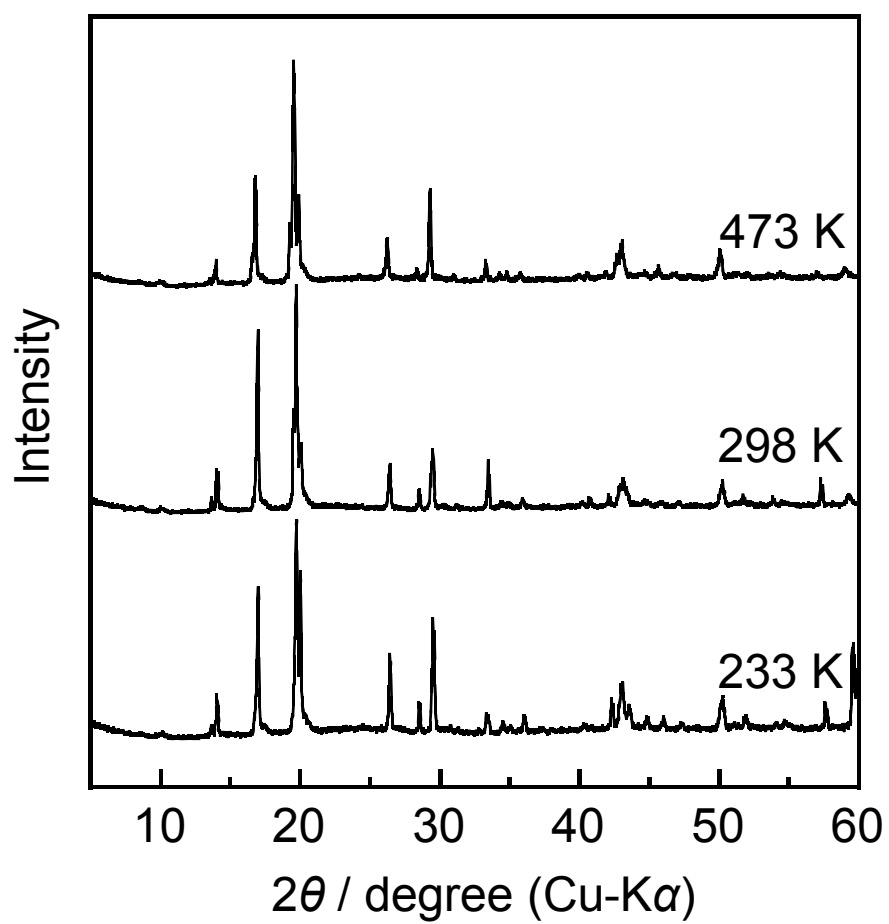

Figure S5 Powder XRD patterns of (a) Phase II at 473 K, (b) Phase III at 298 K, and (c) Phase III at 233 K for  $[P_1][PF_6]$ .

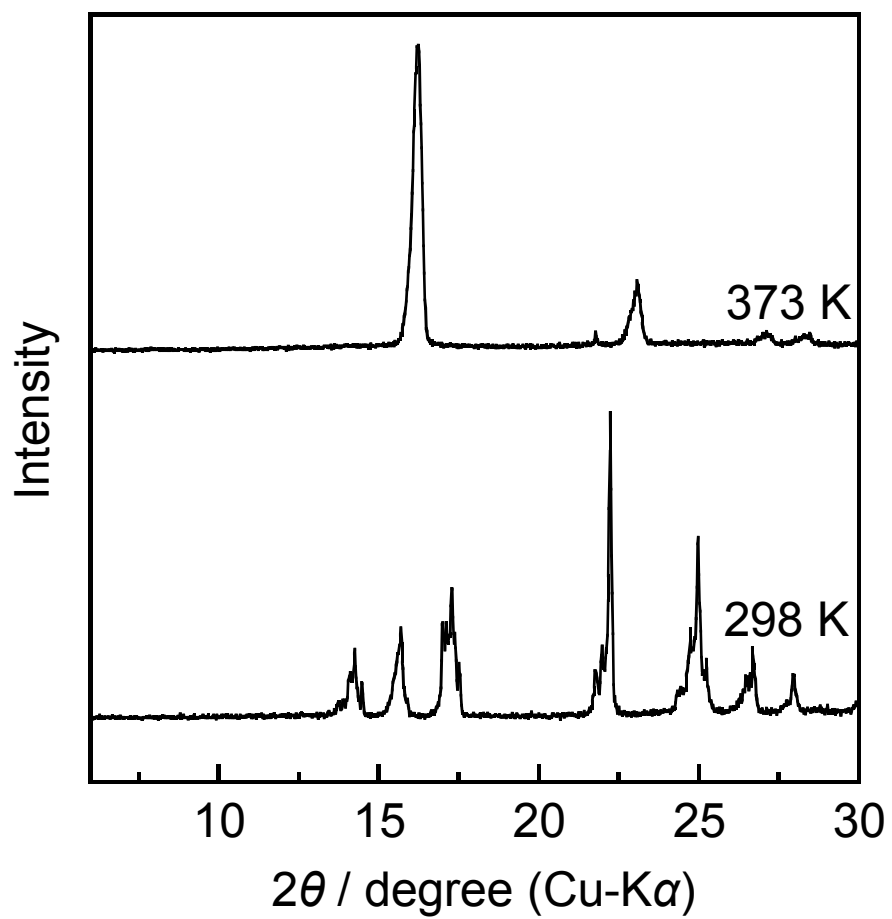

Figure S6 Powder XRD patterns of (a) Phase I at 373 K and (b) Phase II at 298 K for  $[\text{N}_2][\text{BF}_4]$ .

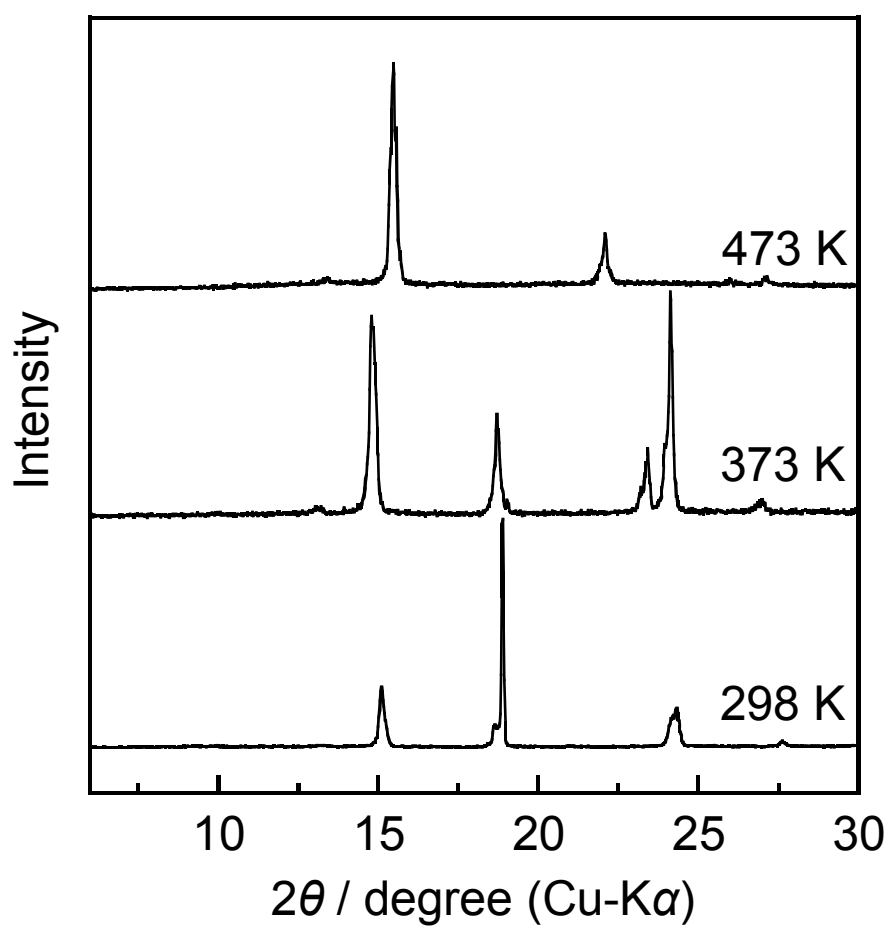

Figure S7 Powder XRD patterns of (a) Phase I at 473 K, (b) Phase II at 373 K, and (c) Phase III at 298 K for  $[P_2][BF_4]$ .

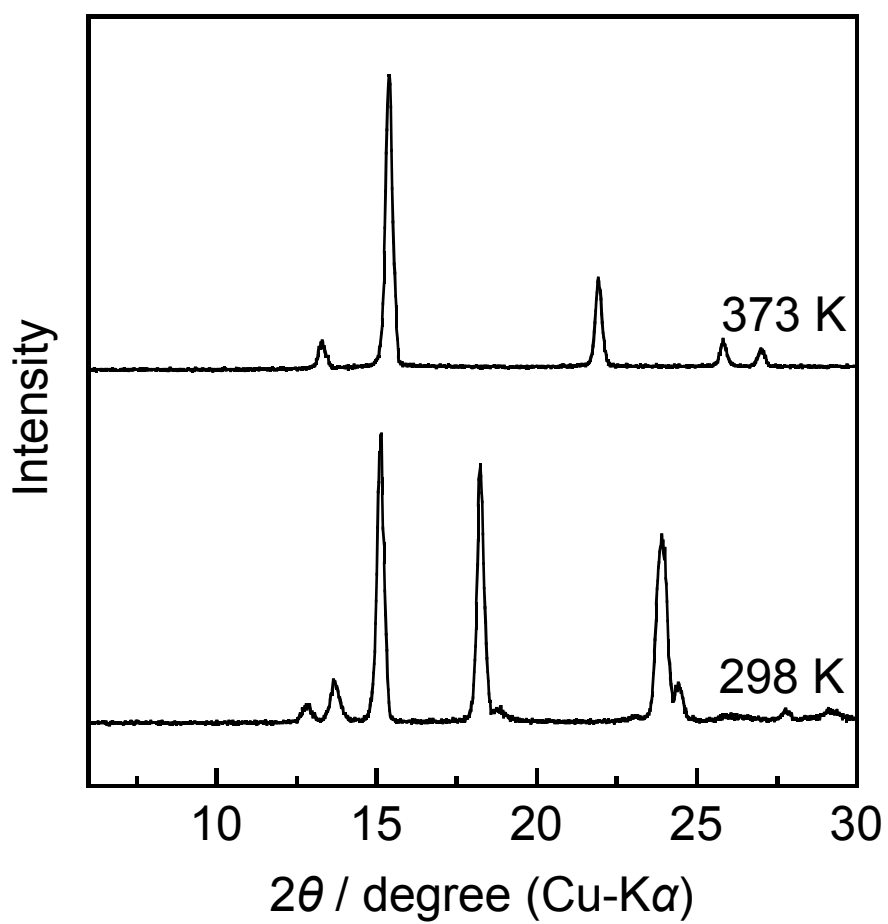

Figure S8 Powder XRD patterns of Phase I at 373 K and Phase II at 298 K for  $[\text{N}_2][\text{PF}_6]$ .

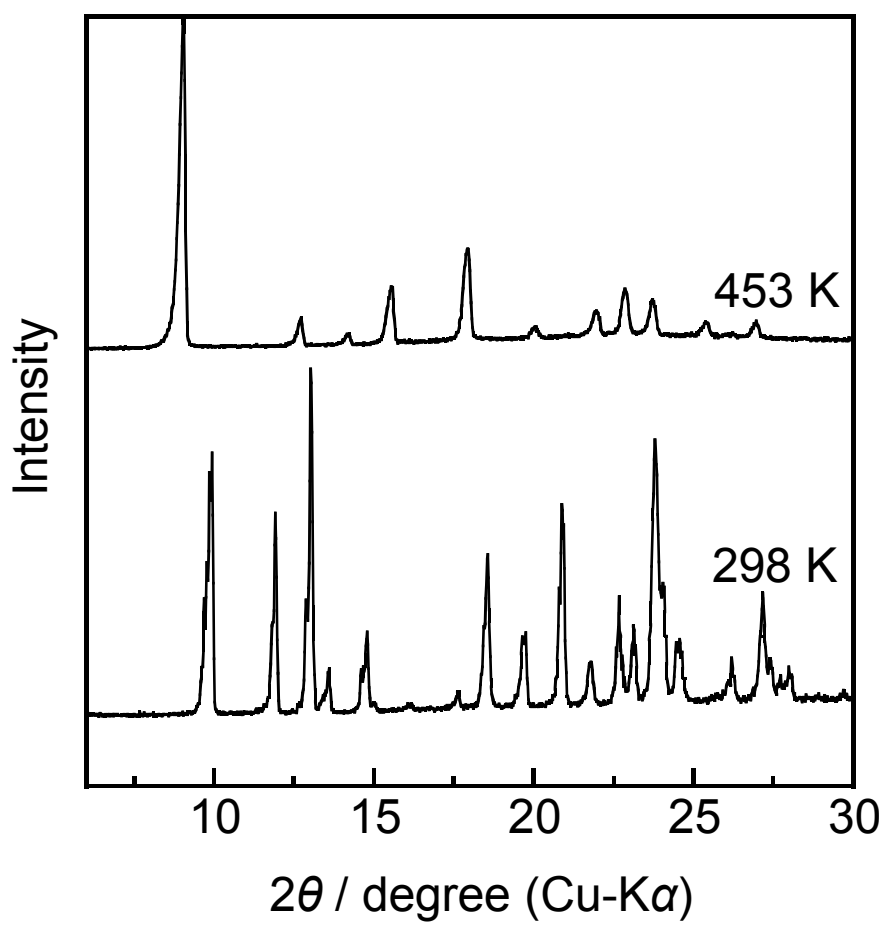

Figure S9 Powder XRD patterns of Phase I at 453 K and Phase II at 298 K for  $[\text{N}_3][\text{BF}_4]$ .

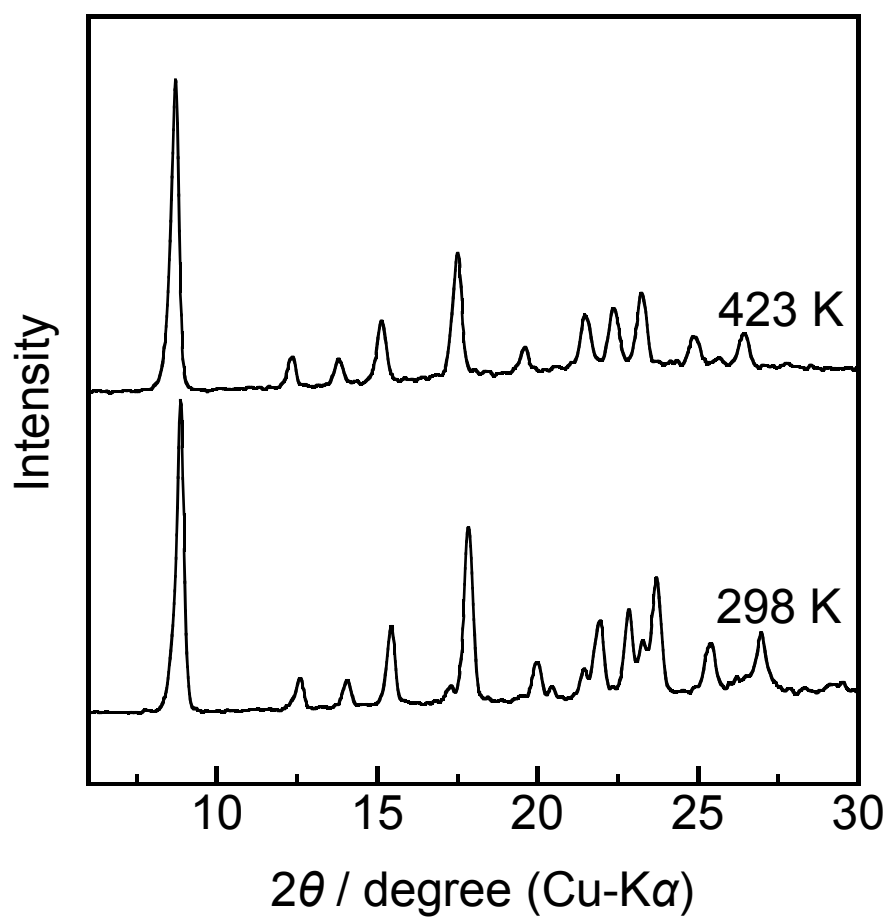

Figure S10 Powder XRD patterns of (a) Phase I at 423 K and (b) Phase II at 298 K for  $[P_3][BF_4]$ .



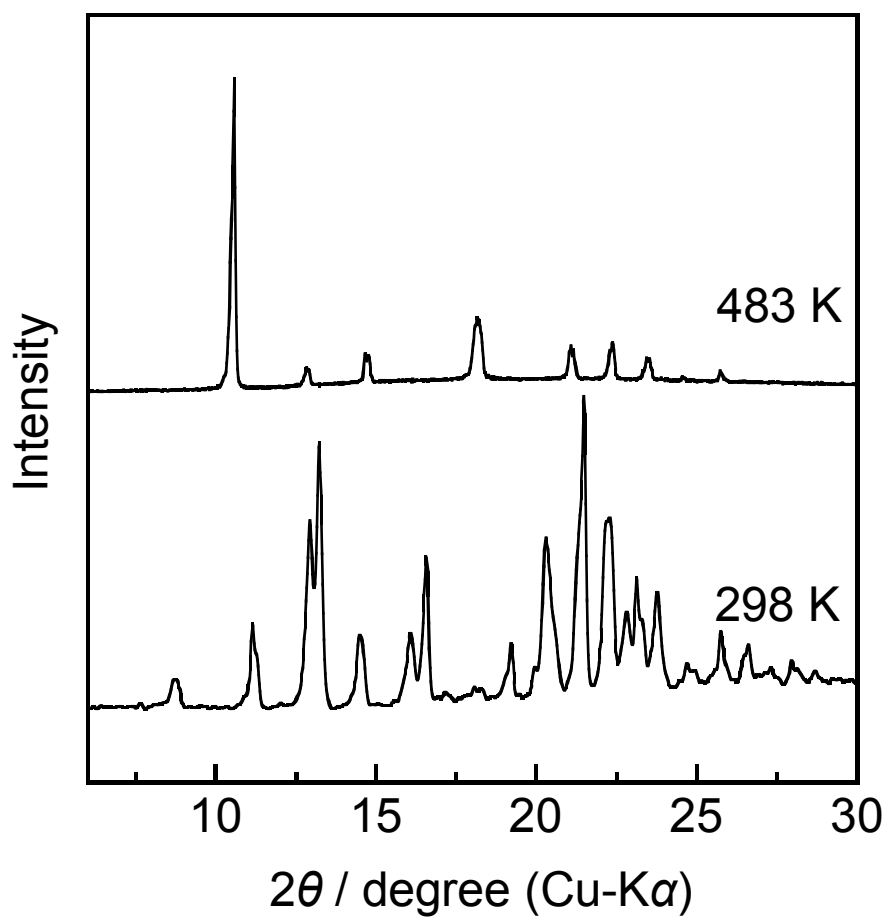

Figure S11 Powder XRD patterns of Phase I at 483 K and Phase II at 298 K for  $[\text{N}_3][\text{PF}_6]$ .

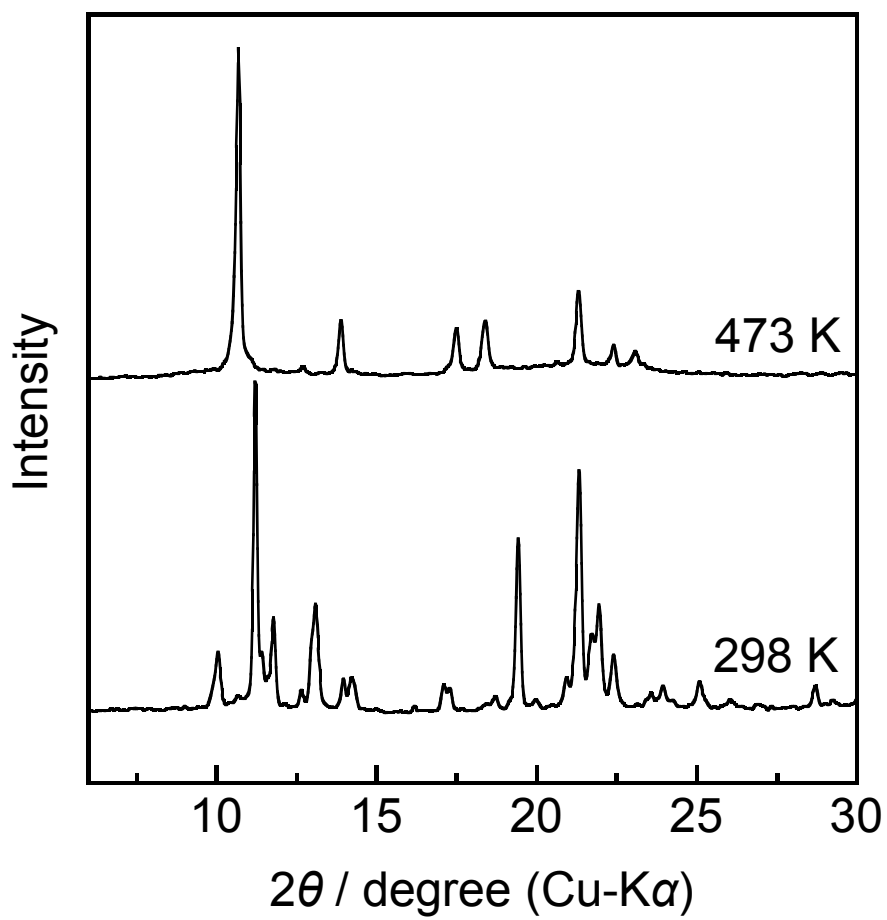

Figure S12 Powder XRD patterns of (a) Phase I at 473 K and (b) Phase II at 298 K for  $[P_3][PF_6]$ .

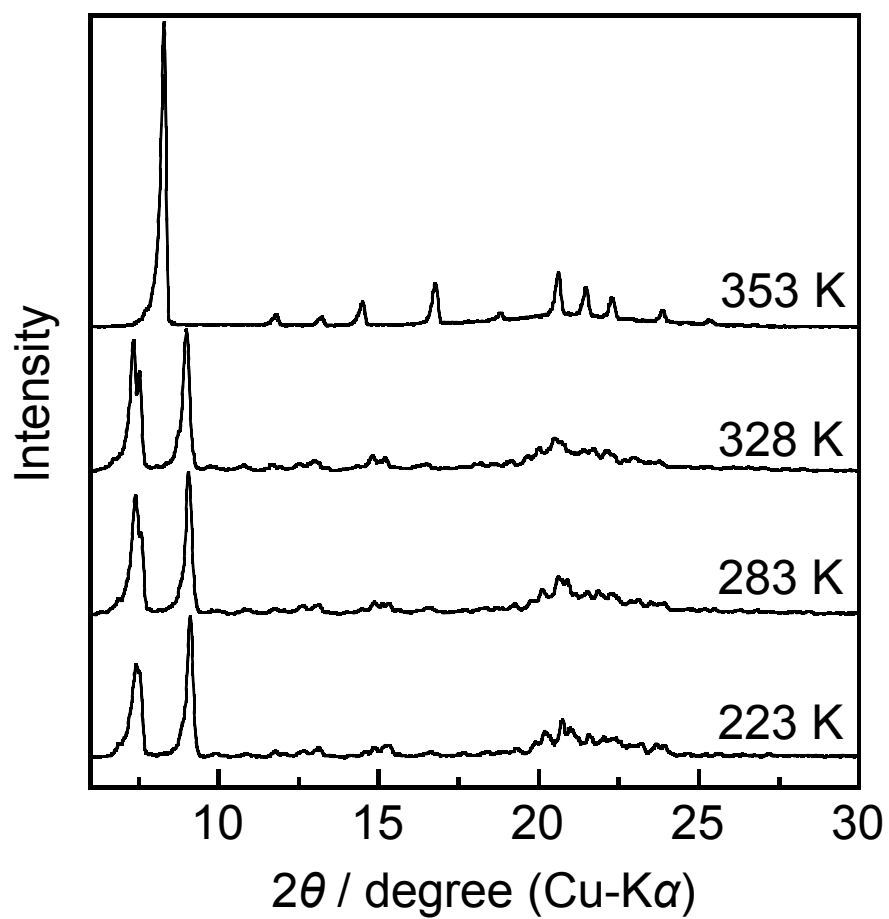

Figure S13 Powder XRD patterns of Phase I at 353 K, Phase II at 328 K, Phase III at 283 K, and Phase IV at 223 K for  $[N_4][BF_4]$ .

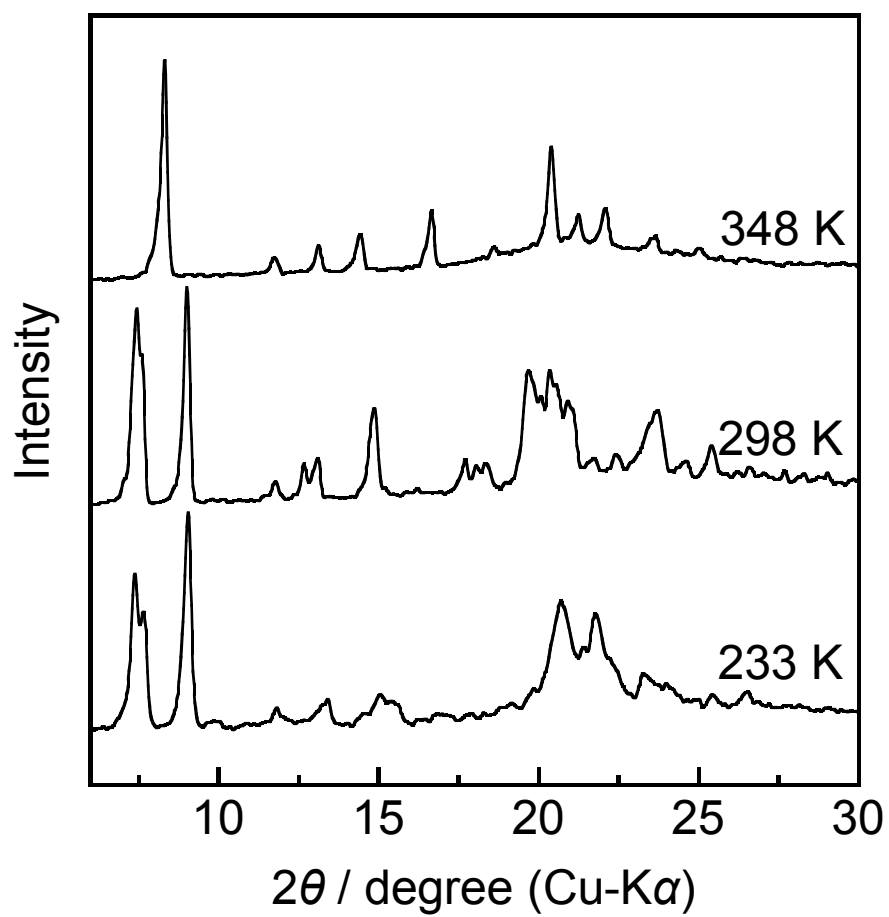

Figure S14 Powder XRD patterns of Phase I at 348 K, Phase II at 298 K, and Phase III at 233 K for  $[P_4][BF_4]$ .

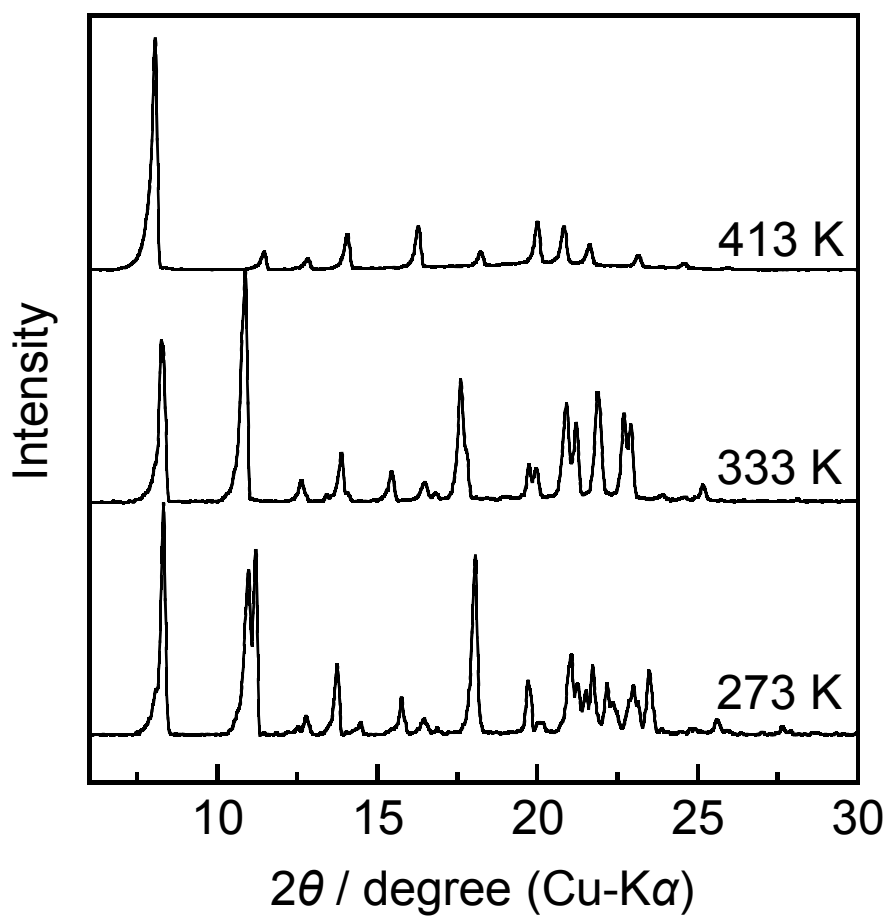

Figure S15 Powder XRD patterns of Phase I at 413 K, Phase II at 333 K, and Phase III at 273 K for  $[N_4][PF_6]$ .

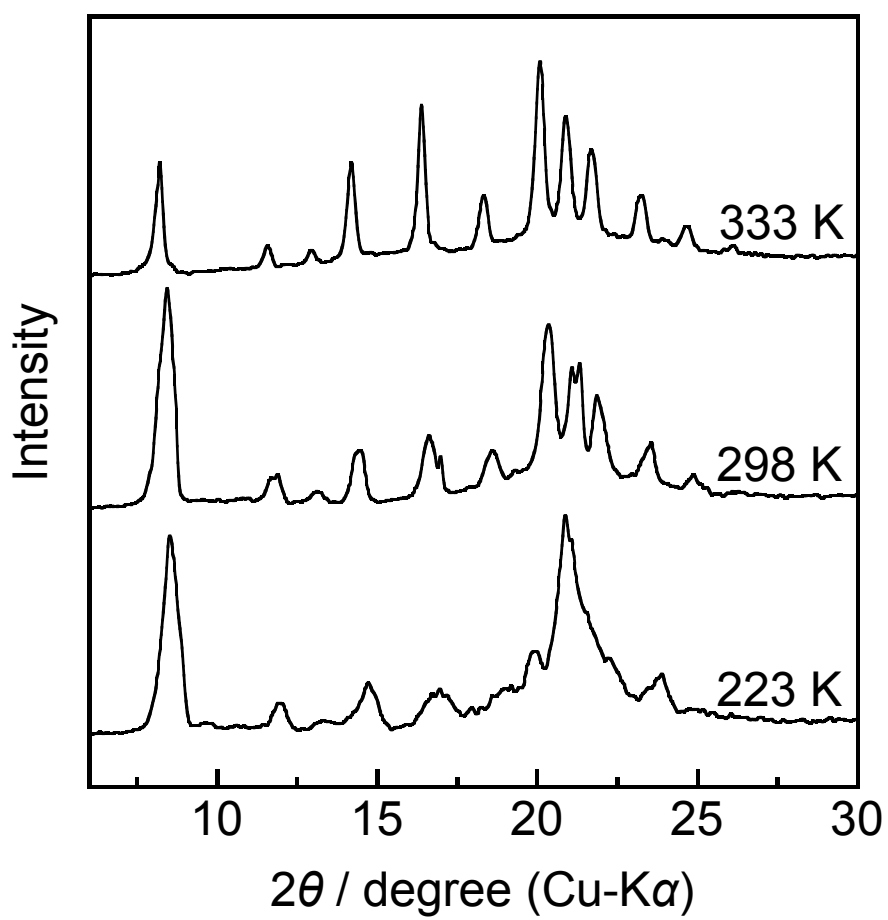

Figure S16 Powder XRD patterns of Phase I at 333 K, Phase II at 298 K, and Phase III at 223 K for  $[P_4][PF_6]$ .

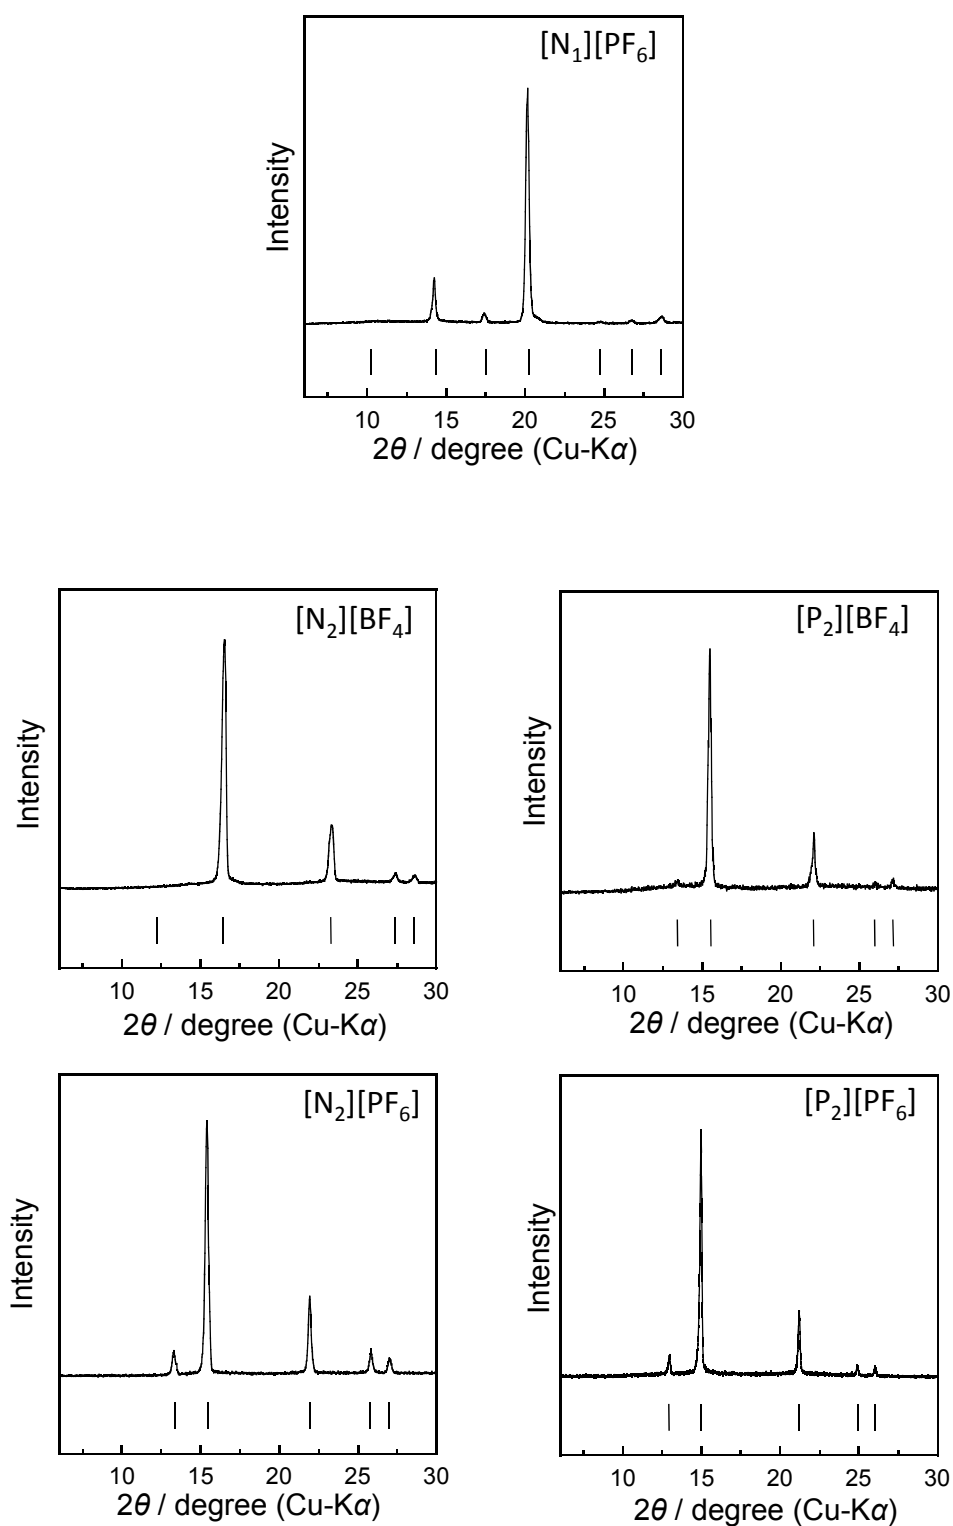

Figure S17 Powder XRD patterns of Phase I for  $[N_1][PF_6]$  (563 K),  $[N_2][BF_4]$  (373 K),  $[P_2][BF_4]$  (473 K),  $[N_2][PF_6]$  (373 K), and  $[P_2][PF_6]$  (498 K). Calculated peak positions are shown by bars at the bottom (see Table S1 for detailed XRD data).

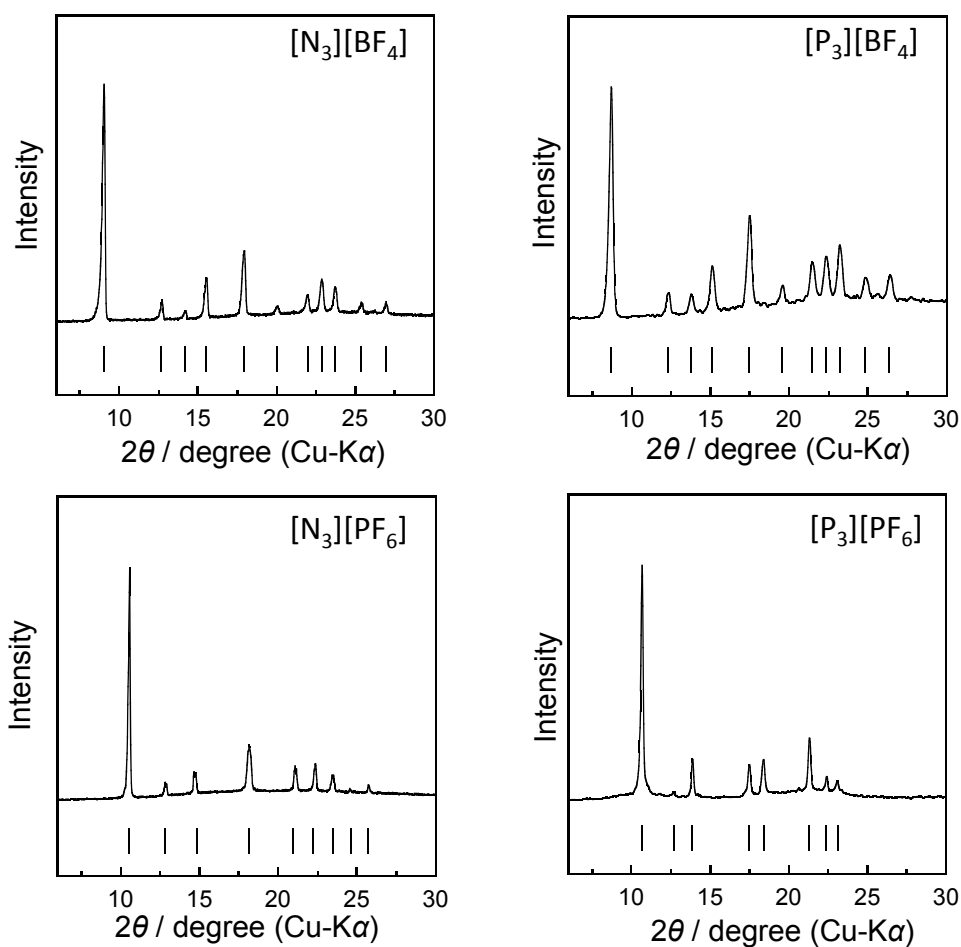

Figure S18 Powder XRD pattern of Phase I for  $[\text{N}_3][\text{BF}_4]$  (453 K),  $[\text{P}_3][\text{BF}_4]$  (423 K),  $[\text{N}_3][\text{PF}_6]$  (493 K), and  $[\text{P}_3][\text{PF}_6]$  (473 K). Calculated peak positions are shown by bars at the bottom (see Table S1 for detailed XRD data).



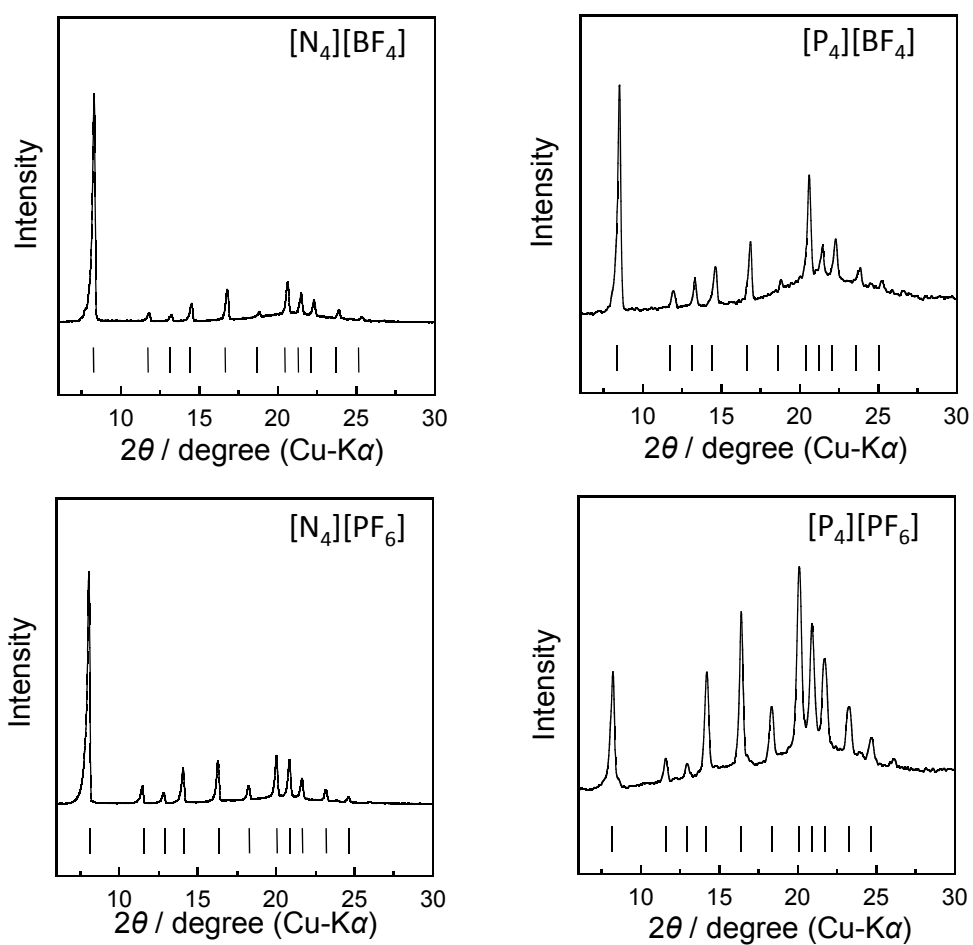

Figure S19 Powder XRD pattern of Phase I for  $[\text{N}_4][\text{BF}_4]$  (413 K),  $[\text{P}_4][\text{BF}_4]$  (348 K),  $[\text{N}_4][\text{PF}_6]$  (413 K), and  $[\text{P}_4][\text{PF}_6]$  (338 K). Calculated peak positions are shown by bars at the bottom (see Table S1 for detailed XRD data).

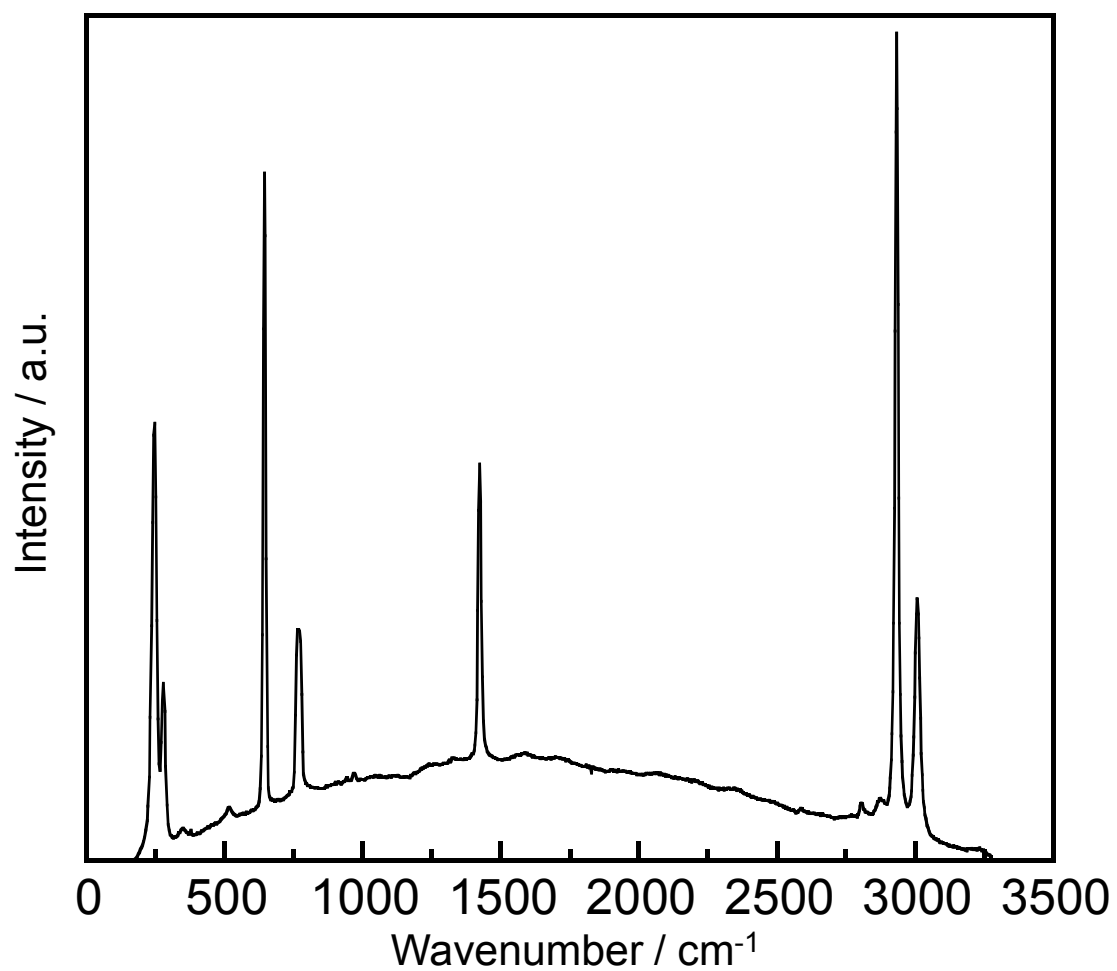

Figure S20 Raman spectrum of  $[P_1][BF_4]$  at 298 K.

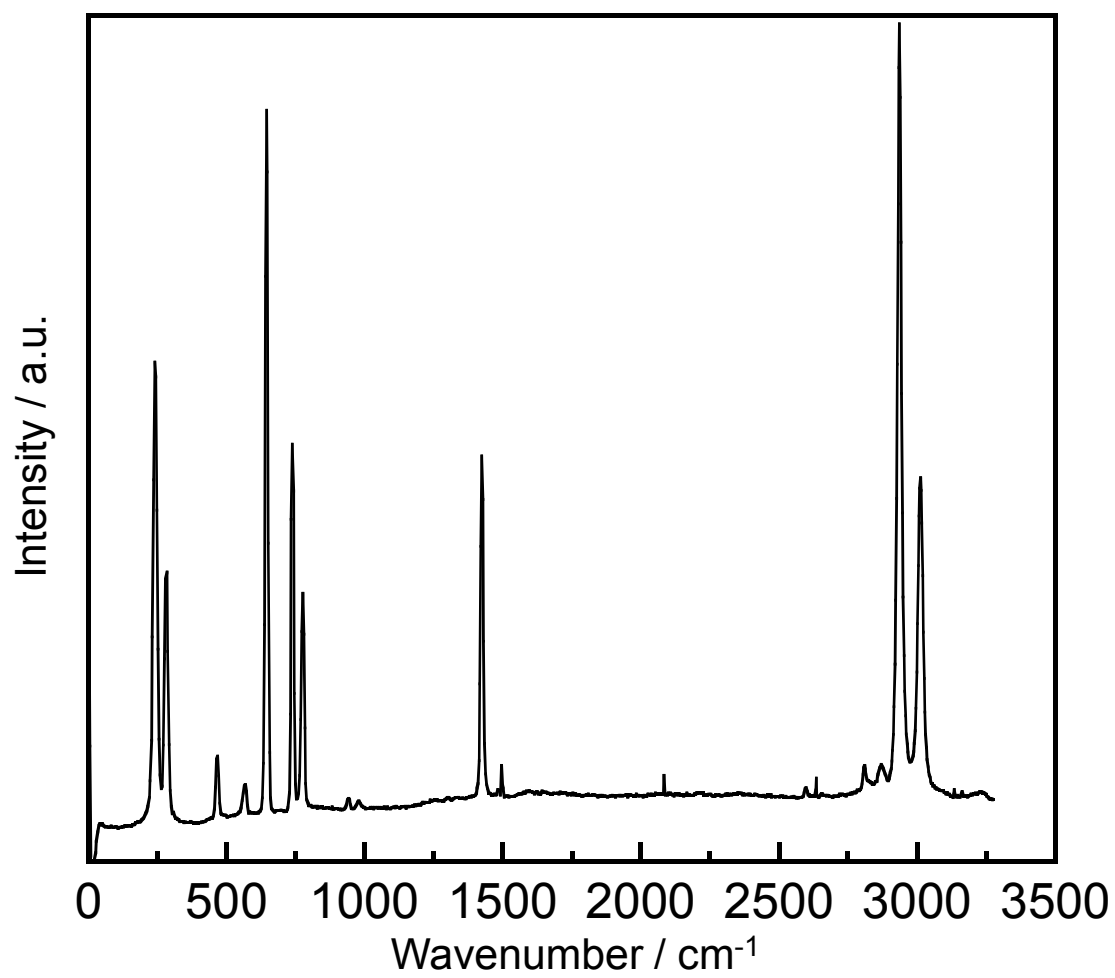

Figure S21 Raman spectrum of  $[P_1][PF_6]$  at 298 K.

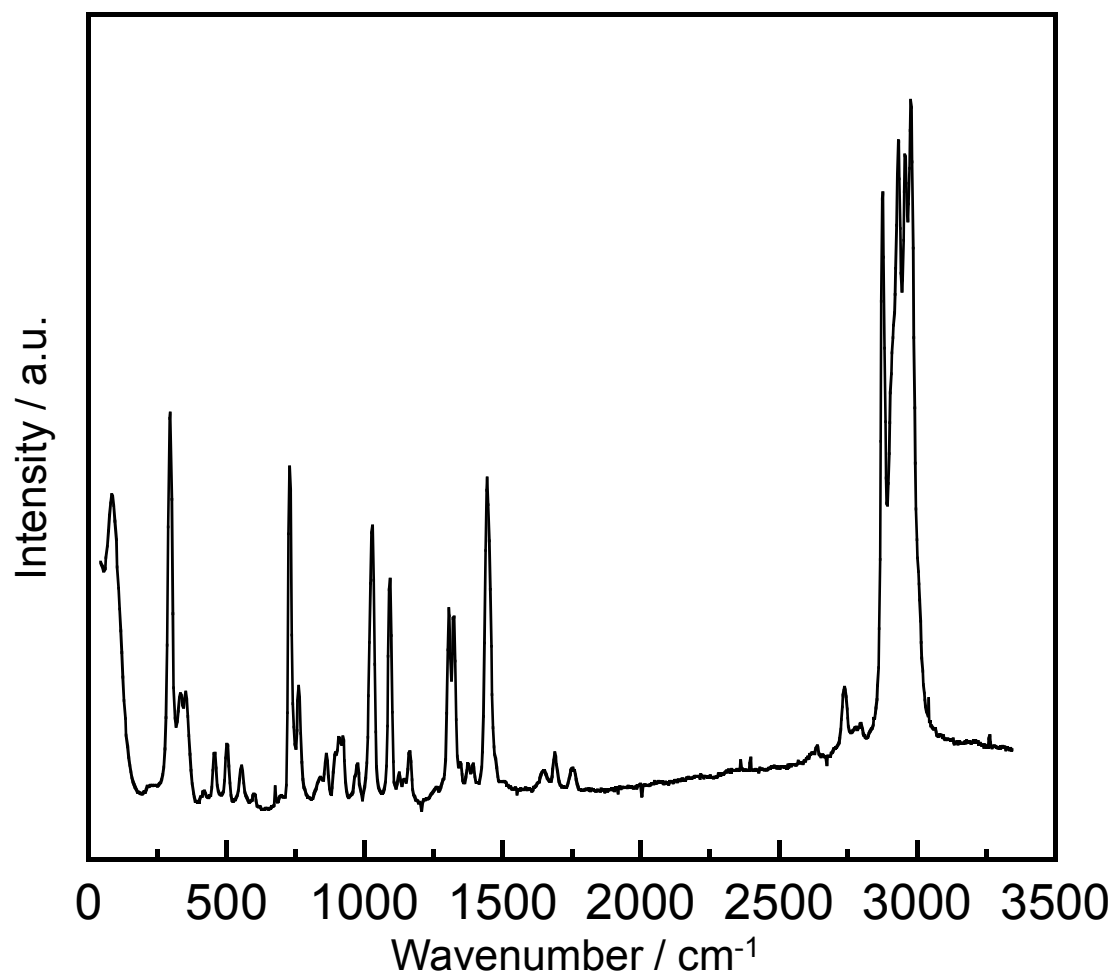

Figure S22 Raman spectrum of  $[\text{N}_3][\text{PF}_6]$  at 298 K.

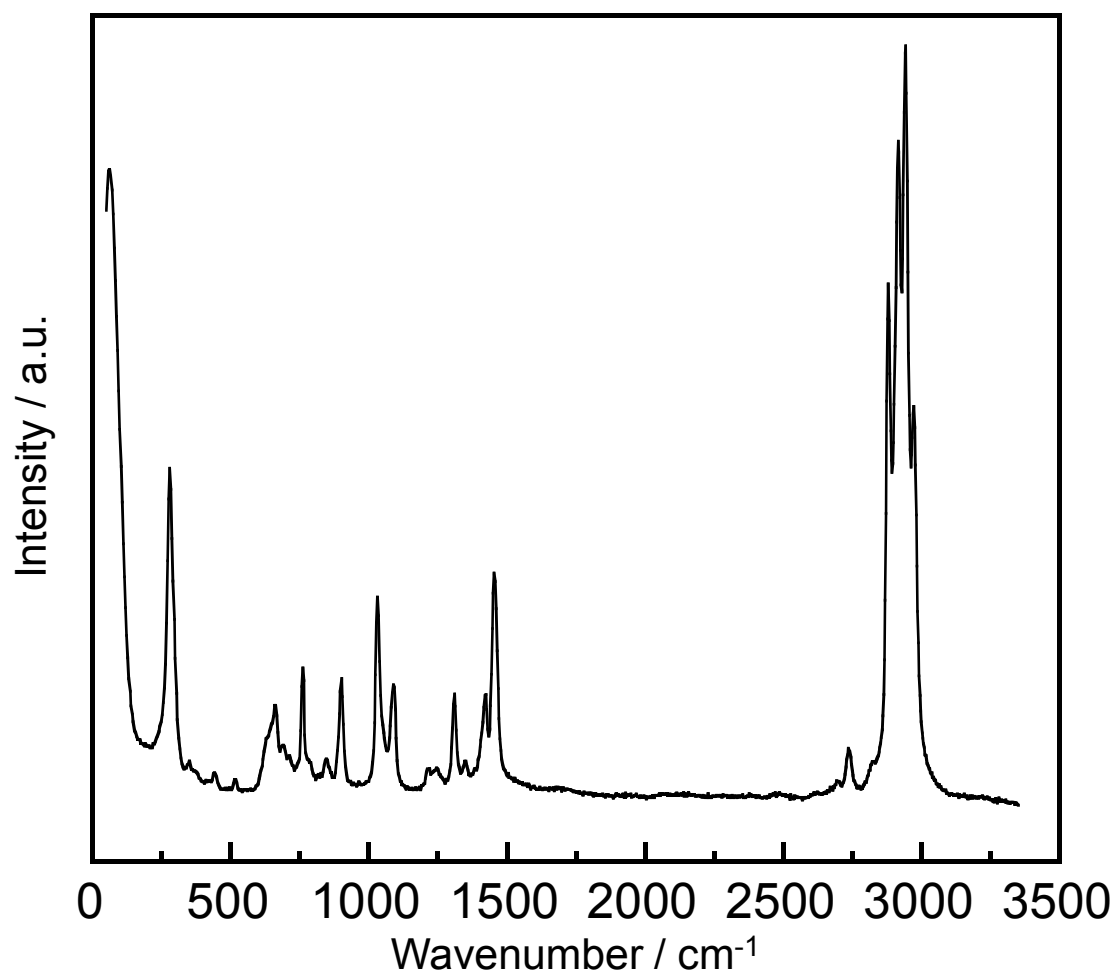

Figure S23 Raman spectrum of  $[P_3][BF_4]$  at 298 K.

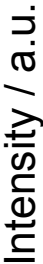Figure S24 Raman spectrum of  $[\text{P}_3][\text{PF}_6]$  at 298 K.

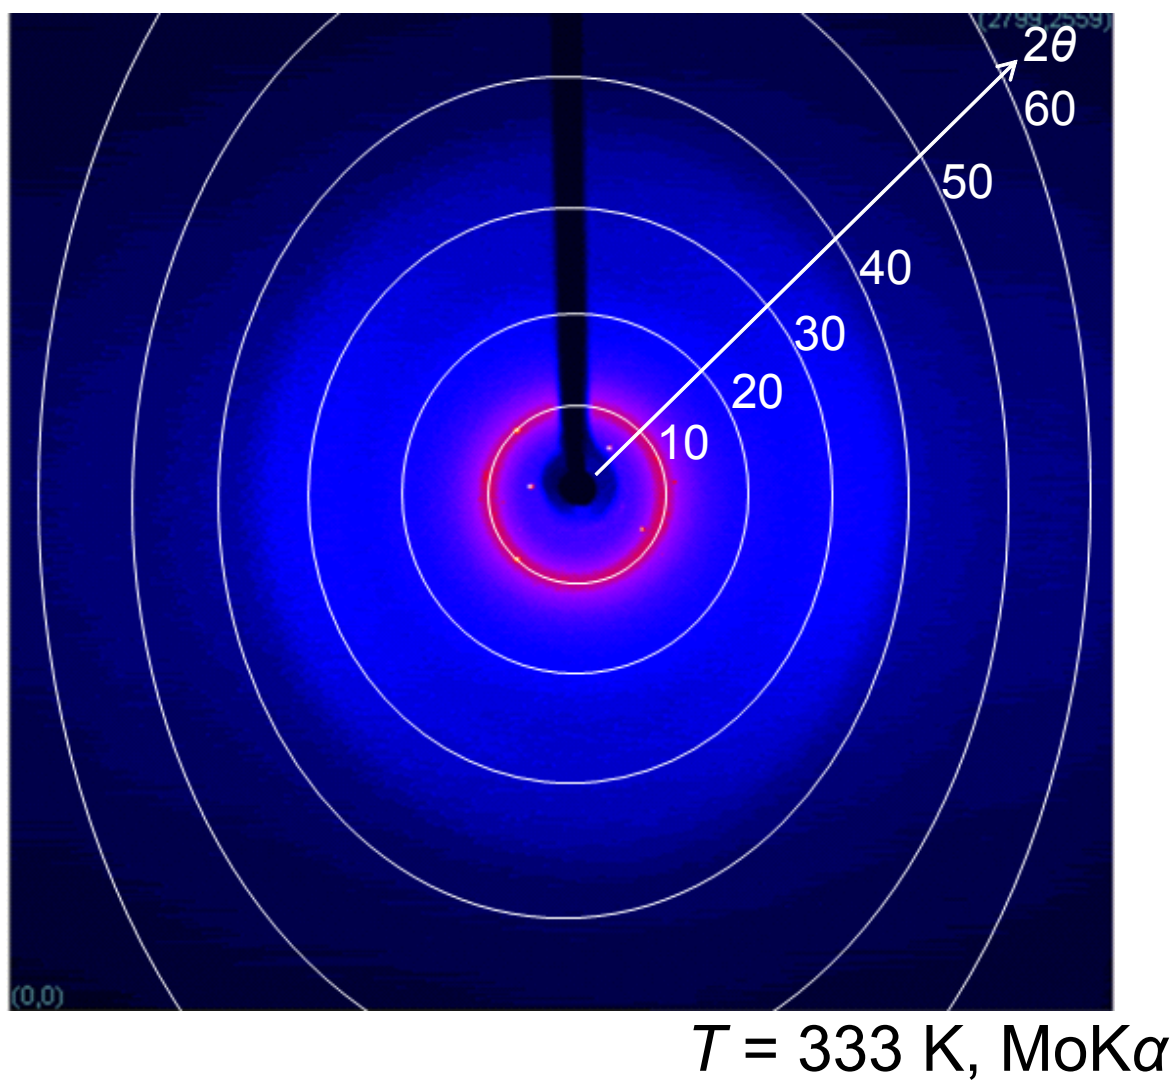

Figure S25 An X-ray diffraction image of Phase I for  $[\text{P}_4][\text{PF}_6]$  obtained at 333 K.
